# Supplementary material for: Missing puzzle in crystal engineering: 2-pyridone and [1,3,5]-triazine-2,4-diamine, the two most common cyclic hydrogen bonding sticky sites, in a single core
Source: Royal Society of Chemistry journal article supplement (doi:10.1039/d2ce01505f), 2023-01-01
Supplement: d2ce01505f1.pdf [file d2ce01505f1.pdf]

## Supplementary Information

### Missing Puzzle in Crystal Engineering: 2-Pyridone and [1,3,5]-Triazine-2,4-diamine, Two Most Common Cyclic Hydrogen Bonding Sticky Sites, in a Single Core

Adela Abidi,<sup>\*†</sup> Emmanuelle Fortin,<sup>†</sup> Kariane Larocque,<sup>†</sup> Mohamed Essalhi,<sup>†</sup> Nour Dissem,<sup>†</sup>  
Daniel Chartrand,<sup>‡</sup> Thierry Maris,<sup>‡</sup> Adam Duong<sup>†</sup>

<sup>†</sup>Département de Chimie, Biochimie et Physique, Institut de Recherche sur l'Hydrogène, Laboratory of Functional Materials For Energy and Nanotechnology (DuongLab) and Université du Québec à Trois-Rivières, Trois-Rivières, Québec, G9A 5H7, Canada

<sup>‡</sup>Département de Chimie, Université de Montréal, Montréal, Québec, H3C 3J7, Canada

\*To whom correspondence should be addressed. E-mail: adela.abidi@uqtr.ca

| Contents |                                                                                                                                                     | Page |
|----------|-----------------------------------------------------------------------------------------------------------------------------------------------------|------|
| I.       | <b>Fig. S1</b> IR spectrum of compounds <b>1-4</b>                                                                                                  | S3   |
| II.      | <b>Fig. S2</b> IR spectrum of compounds <b>5-8</b>                                                                                                  | S3   |
| III.     | <b>Fig. S3</b> <sup>1</sup> H NMR spectrum of compound <b>1</b> in DMSO- <i>d</i> <sub>6</sub> .                                                    | S4   |
| IV.      | <b>Fig. S4</b> <sup>13</sup> C NMR spectrum of compound <b>1</b> in DMSO- <i>d</i> <sub>6</sub> .                                                   | S4   |
| V.       | <b>Fig. S5</b> <sup>1</sup> H NMR spectrum of compound <b>2</b> in DMSO- <i>d</i> <sub>6</sub> .                                                    | S5   |
| VI.      | <b>Fig. S6</b> <sup>13</sup> C NMR spectrum of compound <b>2</b> in DMSO- <i>d</i> <sub>6</sub> .                                                   | S5   |
| VII.     | <b>Fig. S7</b> <sup>1</sup> H NMR spectrum of compound <b>3</b> in DMSO- <i>d</i> <sub>6</sub> .                                                    | S6   |
| VIII.    | <b>Fig. S8</b> <sup>13</sup> C NMR spectrum of compound <b>3</b> in DMSO- <i>d</i> <sub>6</sub> .                                                   | S6   |
| IX.      | <b>Fig. S9</b> <sup>1</sup> H NMR spectrum of compound <b>4</b> in DMSO- <i>d</i> <sub>6</sub> .                                                    | S7   |
| X.       | <b>Fig. S10</b> <sup>13</sup> C NMR spectrum of compound <b>4</b> in DMSO- <i>d</i> <sub>6</sub> .                                                  | S7   |
| XI.      | <b>Fig. S11</b> <sup>1</sup> H NMR spectrum of compound <b>5</b> in DMSO- <i>d</i> <sub>6</sub> .                                                   | S8   |
| XII.     | <b>Fig. S12</b> <sup>13</sup> C NMR spectrum of compound <b>5</b> in DMSO- <i>d</i> <sub>6</sub> .                                                  | S8   |
| XIII.    | <b>Fig. S13</b> <sup>1</sup> H NMR spectrum of compound <b>6</b> in DMSO- <i>d</i> <sub>6</sub> .                                                   | S9   |
| XIV.     | <b>Fig. S14</b> <sup>13</sup> C NMR spectrum of compound <b>6</b> in DMSO- <i>d</i> <sub>6</sub> .                                                  | S9   |
| XV.      | <b>Fig. S15</b> <sup>1</sup> H NMR spectrum of compound <b>7</b> in DMSO- <i>d</i> <sub>6</sub> .                                                   | S10  |
| XVI.     | <b>Fig. S16</b> <sup>13</sup> C NMR spectrum of compound <b>7</b> in DMSO- <i>d</i> <sub>6</sub> .                                                  | S10  |
| XVII.    | <b>Fig. S17</b> <sup>1</sup> H NMR spectrum of compound <b>8</b> in DMSO- <i>d</i> <sub>6</sub> .                                                   | S11  |
| XVIII.   | <b>Fig. S18</b> <sup>13</sup> C NMR spectrum of compound <b>8</b> in DMSO- <i>d</i> <sub>6</sub> .                                                  | S11  |
| XIX.     | <b>Fig. S19</b> PXRD of <b>1-4</b> and <b>7</b> .                                                                                                   | S12  |
| XX.      | <b>Fig. S20</b> Thermal atomic displacement ellipsoid plot of the structure of <b>1</b> grown from slow evaporation of water.                       | S13  |
| XXI.     | <b>Fig. S21</b> View showing hydrogen bonding between two adjacent layers in crystal of <b>1</b> , with one layer highlighted in green for clarity. | S13  |
| XXII.    | <b>Fig. S22</b> Thermal atomic displacement ellipsoid plot of the structure of <b>2</b> grown from slow evaporation of water.                       | S14  |
| XXIII.   | <b>Fig. S23</b> View showing the adjacent stacking of layers in crystal of <b>2</b> . For clarity one layer is marked in green.                     | S14  |
| XXIV.    | <b>Fig. S24</b> Thermal atomic displacement ellipsoid plot of the structure of <b>3</b> grown from slow evaporation of water.                       | S15  |
| XXV.     | <b>Fig. S25</b> View showing hydrogen bonding between adjacent layers in crystal of <b>3</b> , one layer highlighted in green for clarity.          | S15  |

|         |                                                                                                                                             |     |
|---------|---------------------------------------------------------------------------------------------------------------------------------------------|-----|
| XXVI.   | <b>Fig. S26</b> Thermal atomic displacement ellipsoid plot of the structure of <b>4</b> grown from slow evaporation of water.               | S16 |
| XXVII.  | <b>Fig. S27</b> View showing the packing of layers in crystal of <b>4</b> . For clarity one layer is marked in green.                       | S16 |
| XXVIII. | <b>Table S1</b> Hydrogen-bond geometry (Å, °) in structure of <b>1</b> .                                                                    | S17 |
| XXIX.   | <b>Table S2</b> Hydrogen-bond geometry (Å, °) in structure of <b>2</b> .                                                                    | S17 |
| XXX.    | <b>Table S3</b> Hydrogen-bond geometry (Å, °) in structure of <b>3</b> .                                                                    | S17 |
| XXXI.   | <b>Table S4</b> Hydrogen-bond geometry (Å, °) in structure of <b>4</b> .                                                                    | S17 |
| XXXII.  | <b>Fig. S28</b> Thermal atomic displacement ellipsoid plot of the structure of <b>5</b> grown from slow evaporation of methanol.            | S18 |
| XXXIII. | <b>Fig. S29</b> View showing the packing of layers in crystal of <b>5</b>                                                                   | S18 |
| XXXIV.  | <b>Fig. S30</b> Thermal atomic displacement ellipsoid plot of the structure of <b>7</b> grown from slow evaporation of acetic acid.         | S19 |
| XXXV.   | <b>Fig. S31</b> View showing the packing of layers in crystal of <b>7</b>                                                                   | S19 |
| XXXVI.  | <b>Table S5</b> Hydrogen-bond geometry (Å, °) in structure of <b>5</b> .                                                                    | S19 |
| XXXVII. | <b>Table S6</b> Hydrogen-bond geometry (Å, °) in structure of <b>7</b>                                                                      | S20 |
| XXVIII. | <b>Fig. S32</b> 2D fingerprint plots with relative contributions in percentage of various intermolecular contacts to HS area for <b>1</b> . | S20 |
| XXXIX.  | <b>Fig. S33</b> 2D fingerprint plots with relative contributions in percentage of various intermolecular contacts to HS area for <b>2</b> . | S21 |
| XL.     | <b>Fig. S34</b> 2D fingerprint plots with relative contributions in percentage of various intermolecular contacts to HS area for <b>3</b> . | S21 |
| XLI.    | <b>Fig. S35</b> 2D fingerprint plots with relative contributions in percentage of various intermolecular contacts to HS area for <b>4</b> . | S22 |
| XLII.   | <b>Fig. S36</b> 2D fingerprint plots with relative contributions in percentage of various intermolecular contacts to HS area for <b>5</b> . | S22 |
| XLIII.  | <b>Fig. S37</b> 2D fingerprint plots with relative contributions in percentage of various intermolecular contacts to HS area for <b>7</b> . | S23 |
| XLIV.   | <b>Fig. S38</b> TGA curves of <b>1-4</b>                                                                                                    | S23 |
| XLV.    | <b>Fig. S39</b> TGA curves of <b>5-8</b>                                                                                                    | S24 |

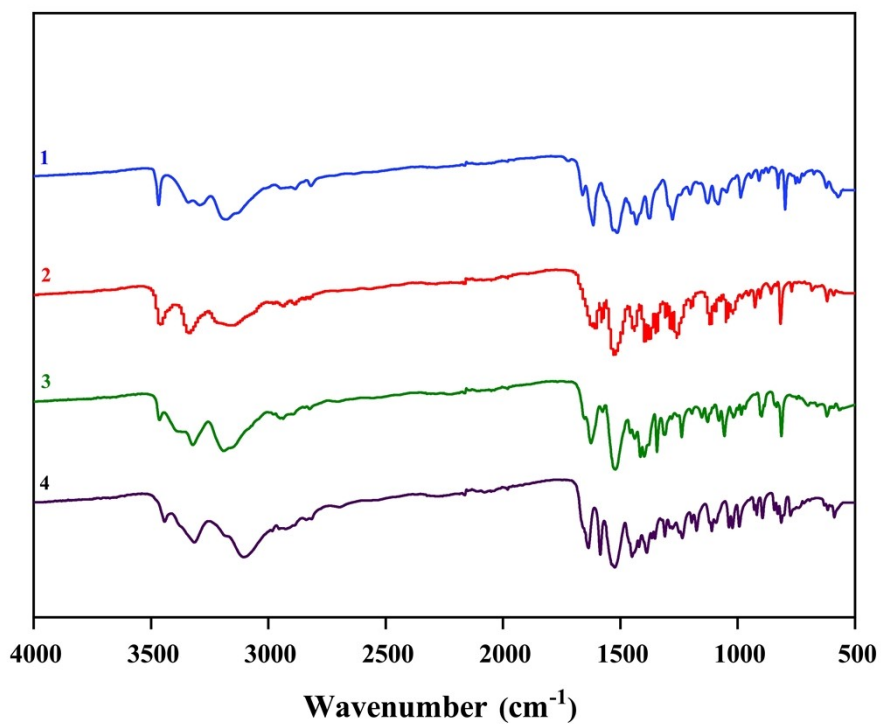

**Fig. S1** Infrared spectra of 1-4.

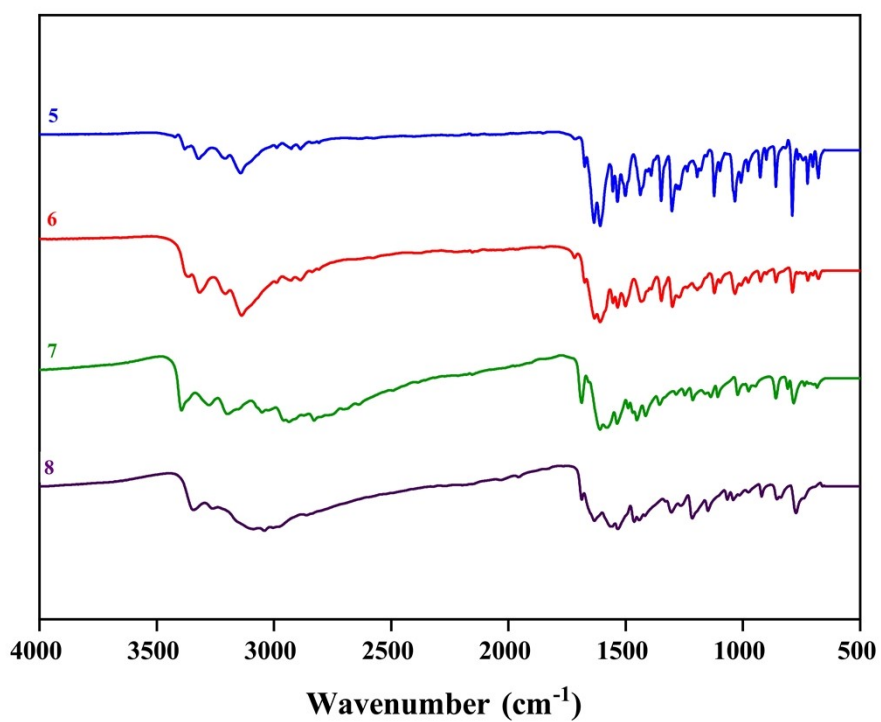

**Fig. S2** Infrared spectra of 5-8.

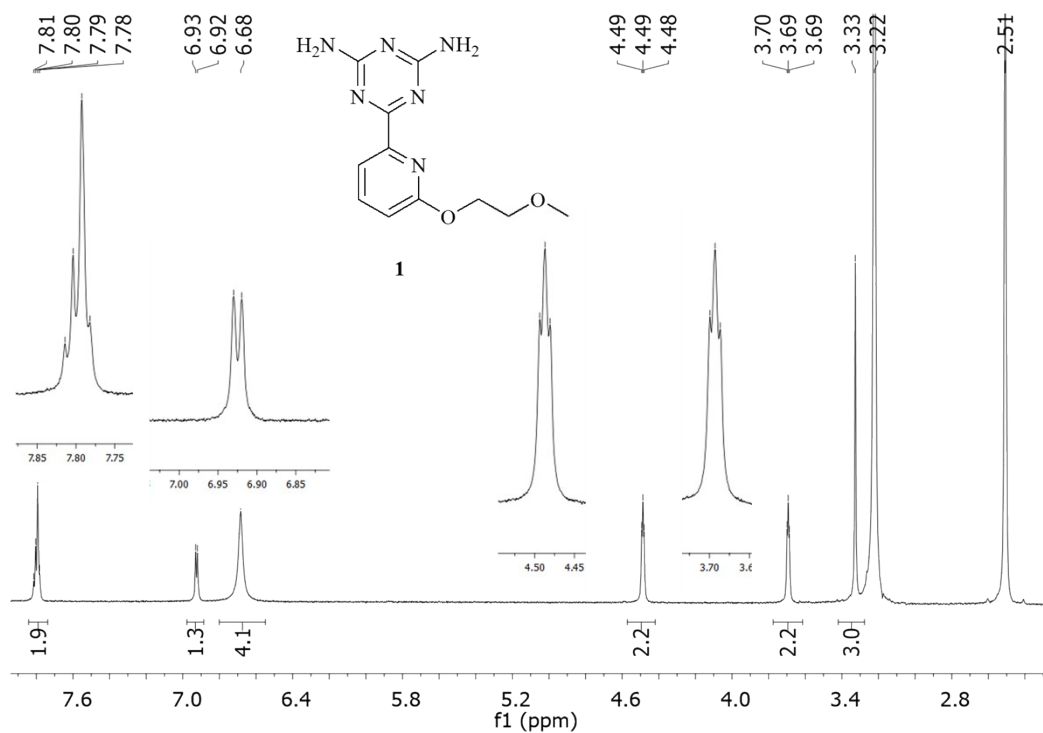

**Fig. S3** <sup>1</sup>H NMR spectrum **1** in DMSO-*d*<sub>6</sub>.

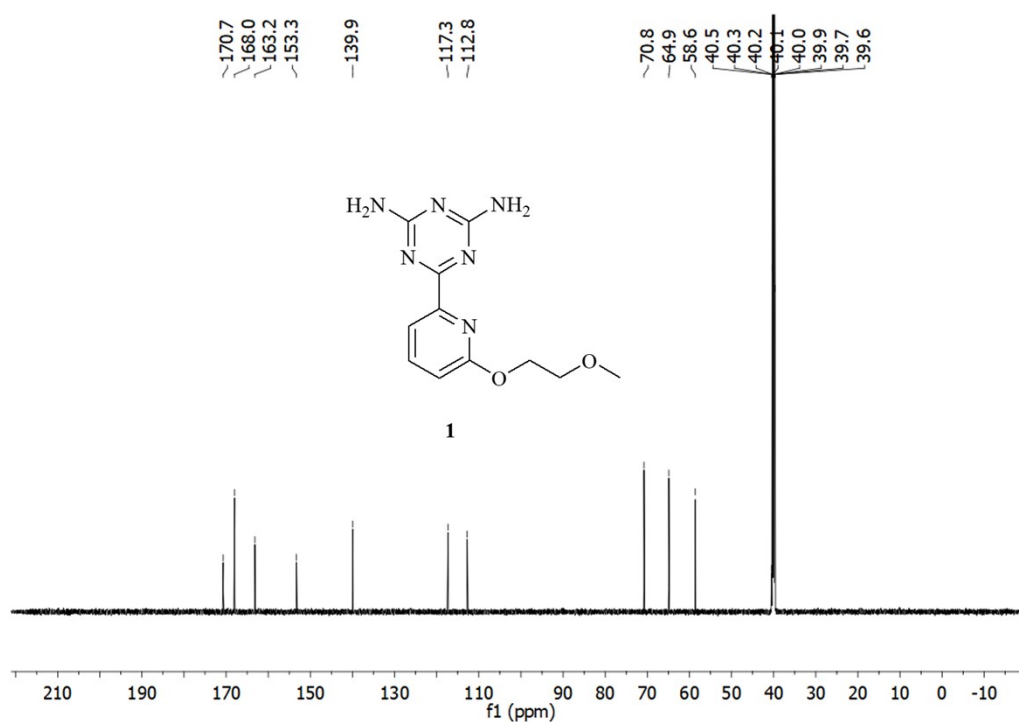

**Fig. S4** <sup>13</sup>C NMR spectrum **1** in DMSO-*d*<sub>6</sub>.

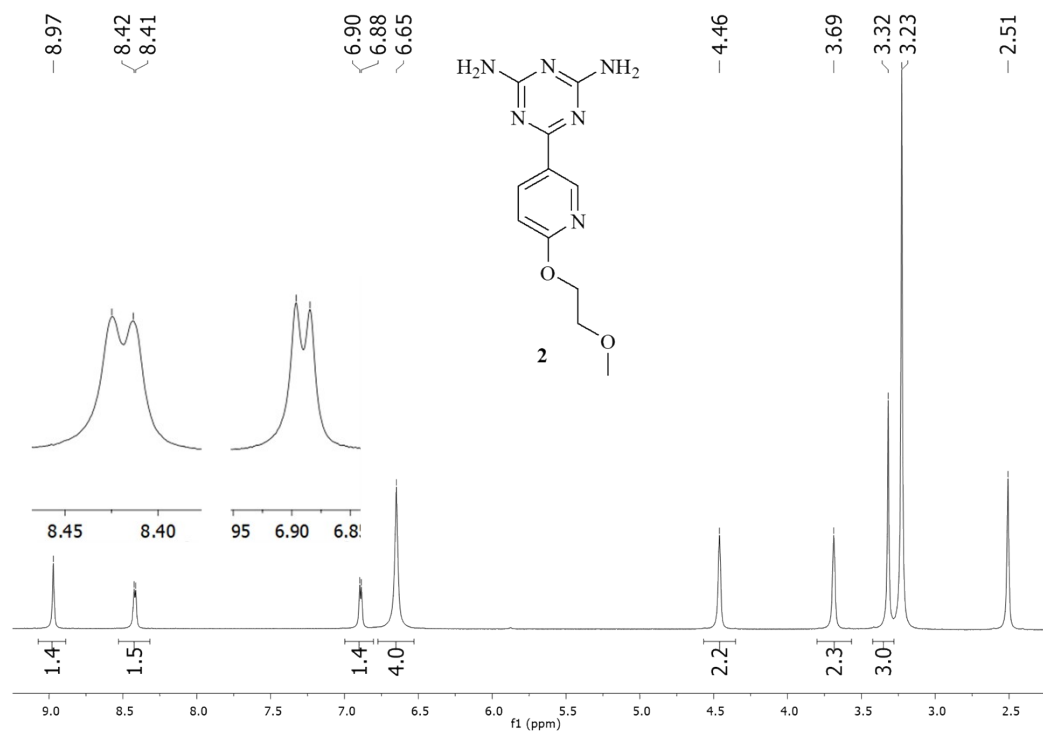

**Fig. S5**  $^1\text{H}$  NMR spectrum **2** in  $\text{DMSO-}d_6$ .

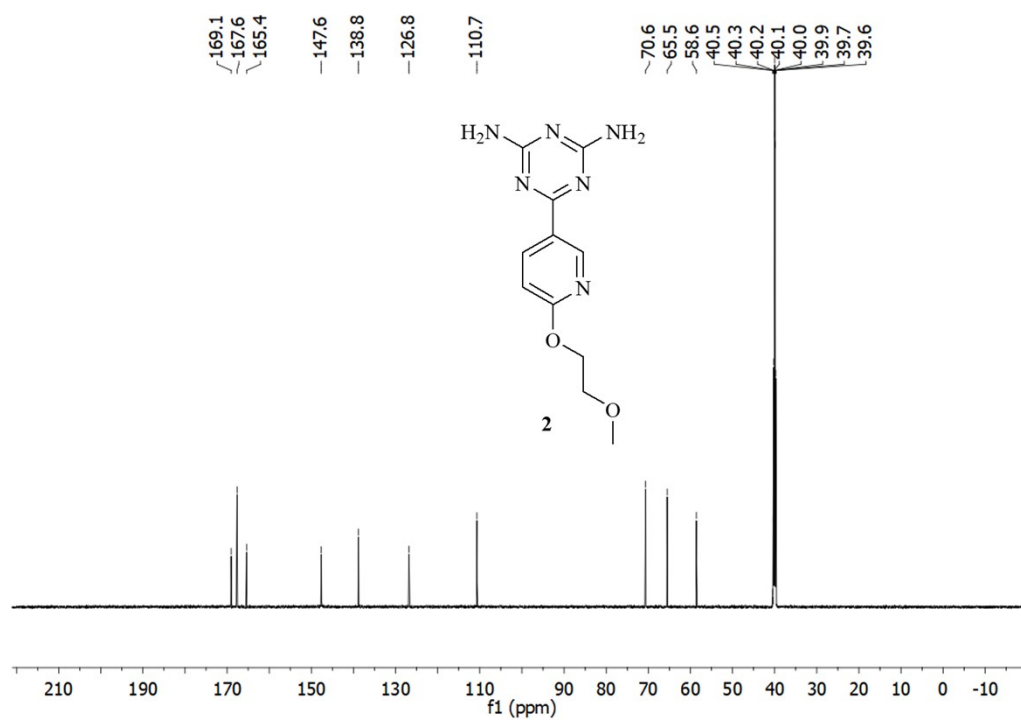

**Fig. S6**  $^{13}\text{C}$  NMR spectrum **2** in  $\text{DMSO-}d_6$ .

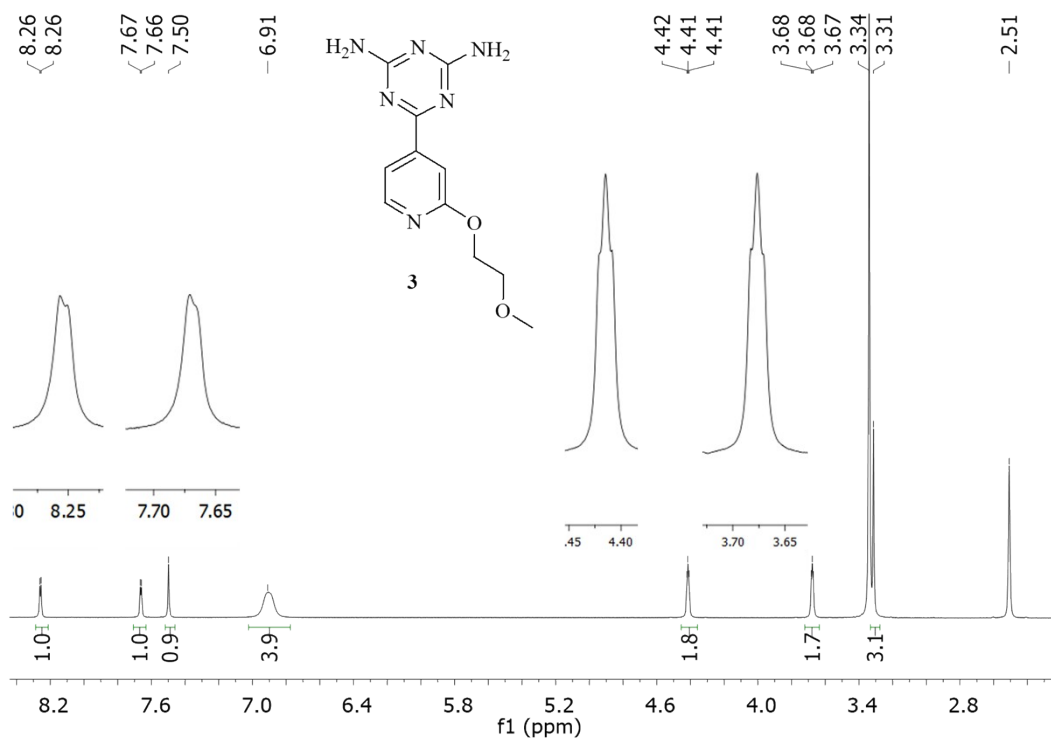

**Fig. S7** <sup>1</sup>H NMR spectrum **3** in DMSO-*d*<sub>6</sub>.

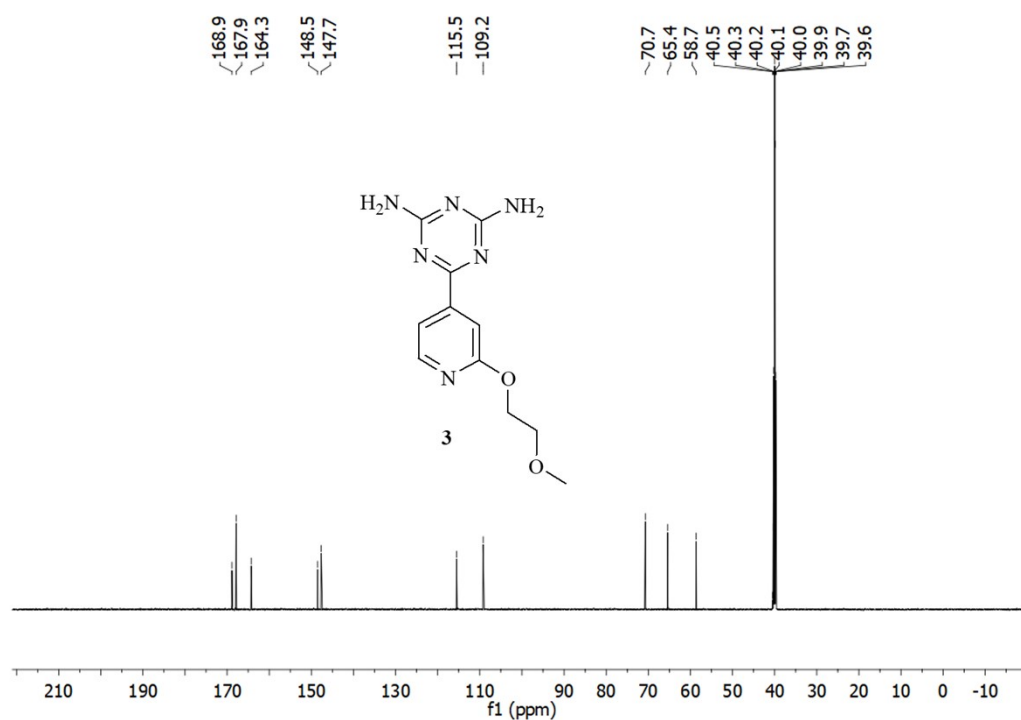

**Fig. S8** <sup>13</sup>C NMR spectrum **3** in DMSO-*d*<sub>6</sub>.

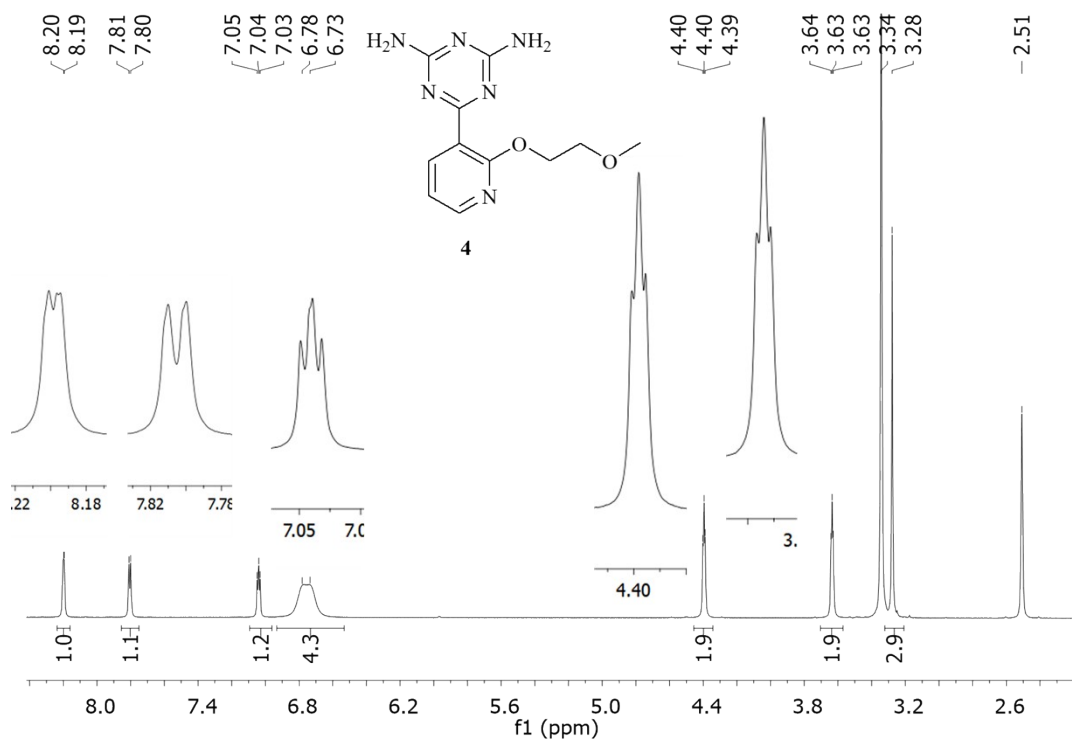

Fig. S9  $^1\text{H NMR}$  spectrum 4 in  $\text{DMSO-}d_6$ .

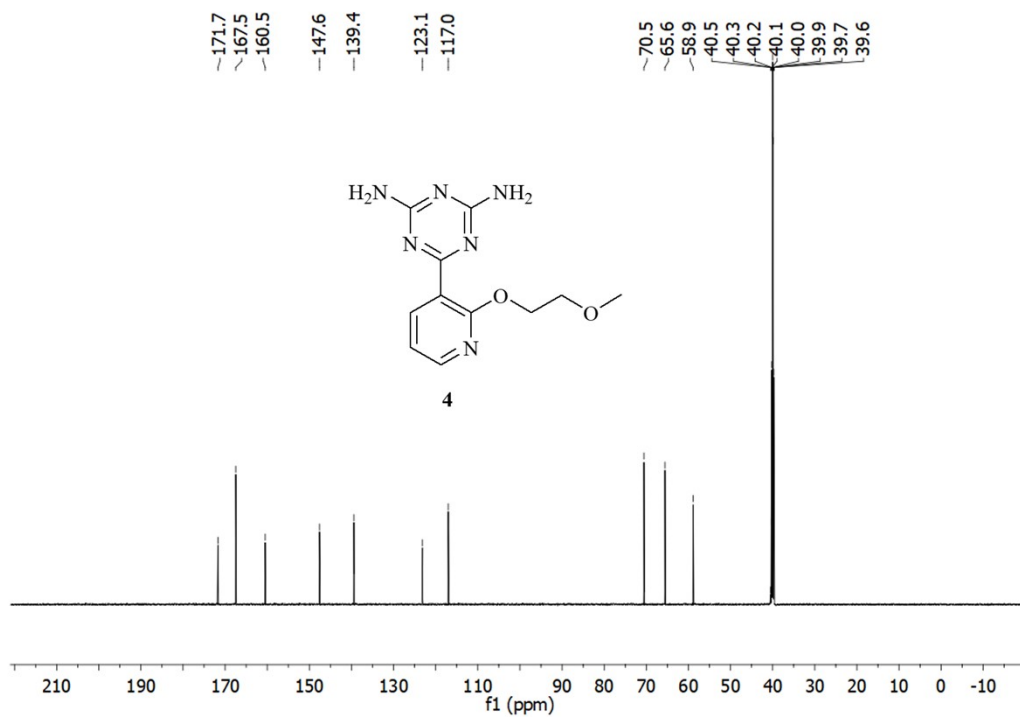

Fig. S10  $^{13}\text{C NMR}$  spectrum 4 in  $\text{DMSO-}d_6$ .

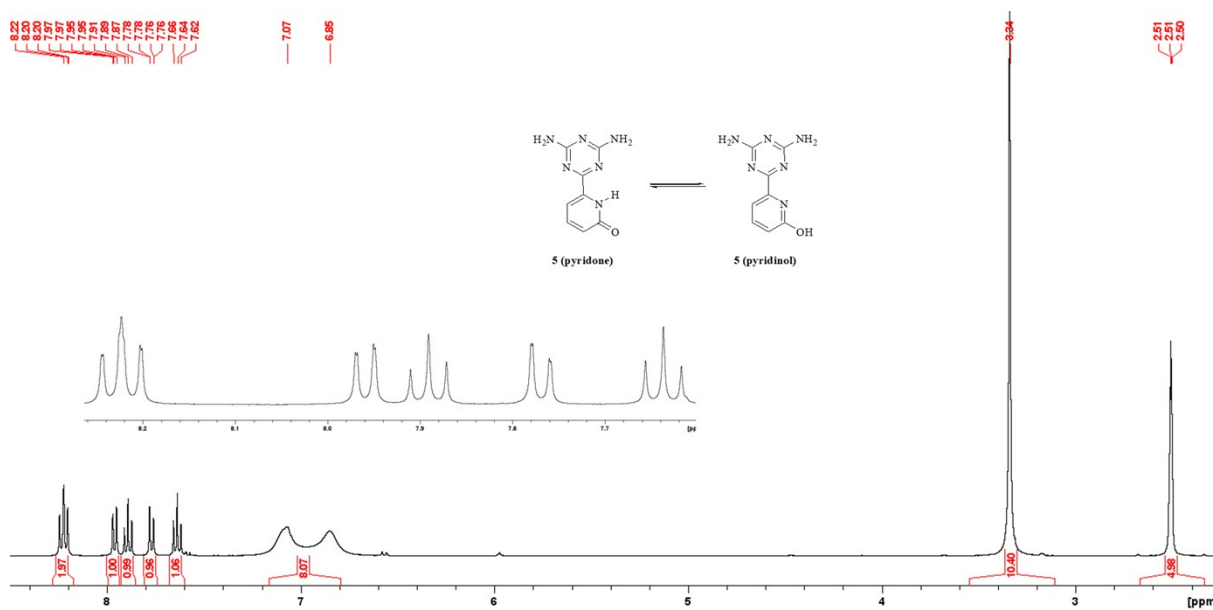

Fig. S11 <sup>1</sup>H NMR spectrum 5 in DMSO-*d*<sub>6</sub>.

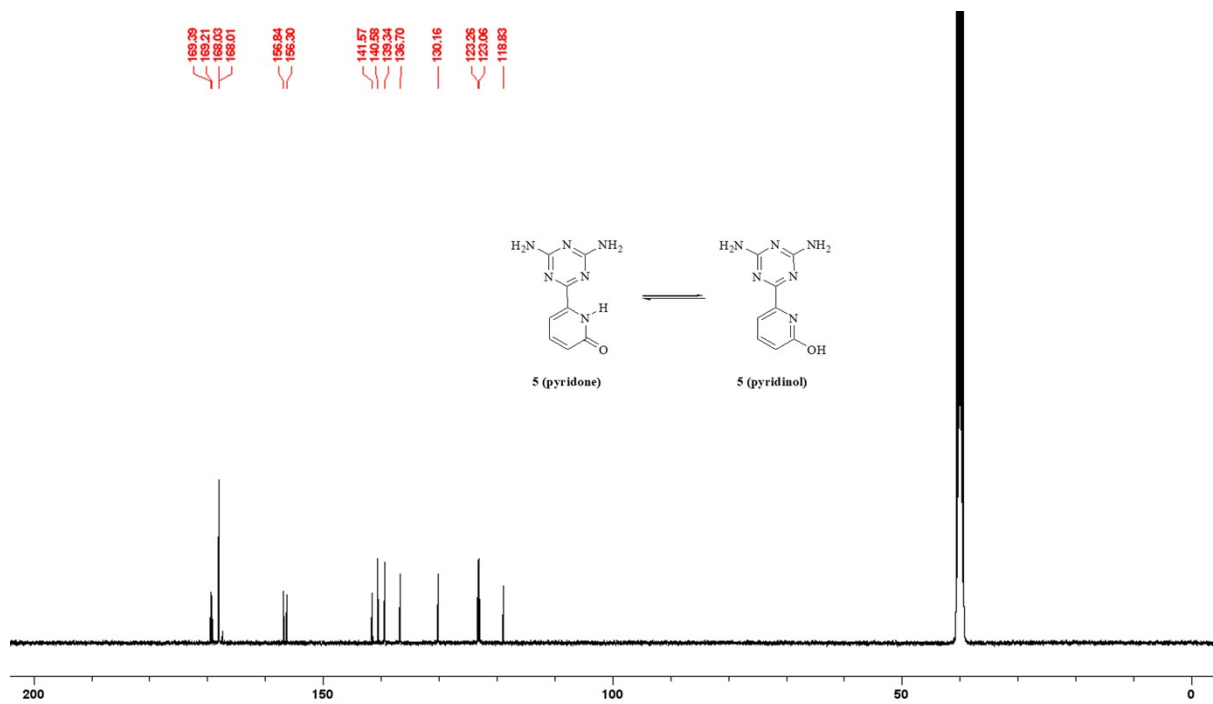

Fig. S12 <sup>13</sup>C NMR spectrum 5 in DMSO-*d*<sub>6</sub>.



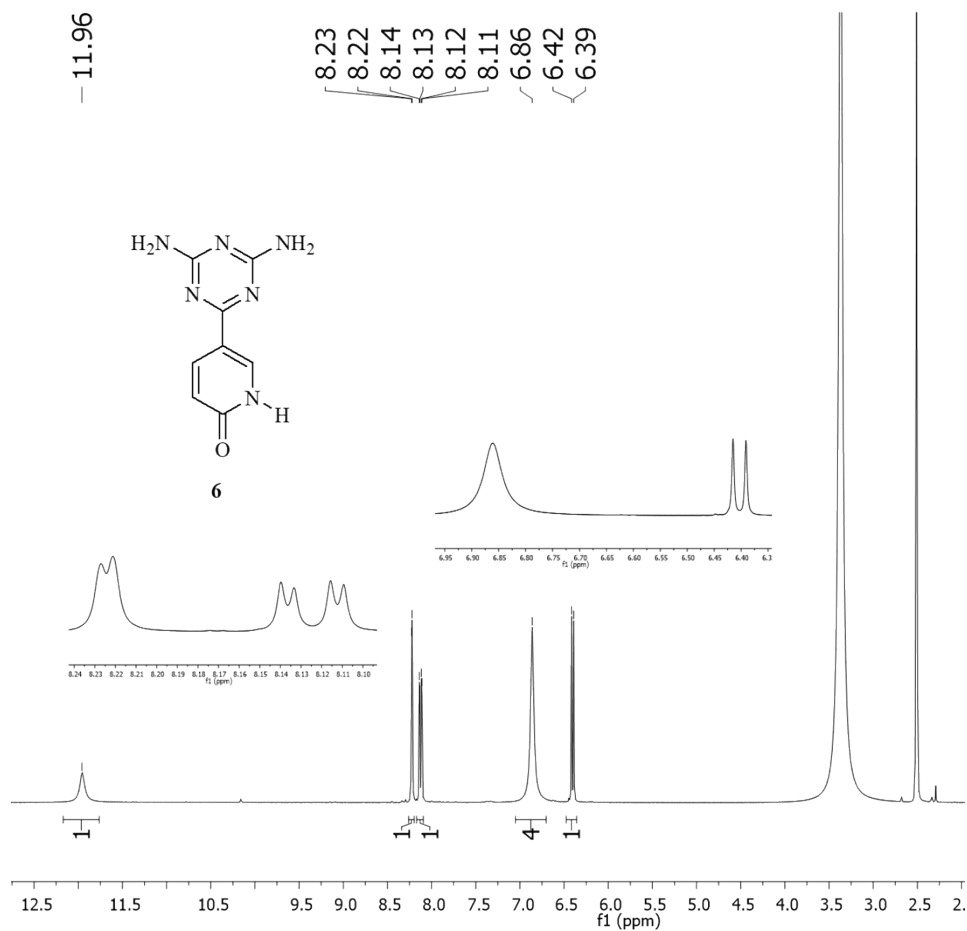

**Fig. S13** <sup>1</sup>H NMR spectrum **6** in DMSO-*d*<sub>6</sub>.

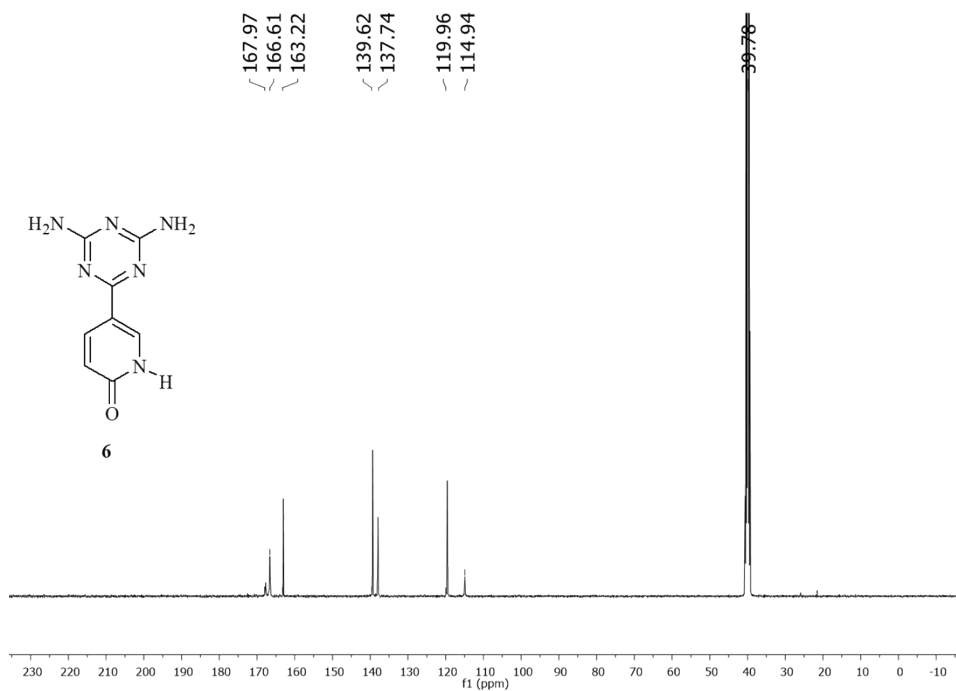

**Fig. S14** <sup>13</sup>C NMR spectrum **6** in DMSO-*d*<sub>6</sub>.

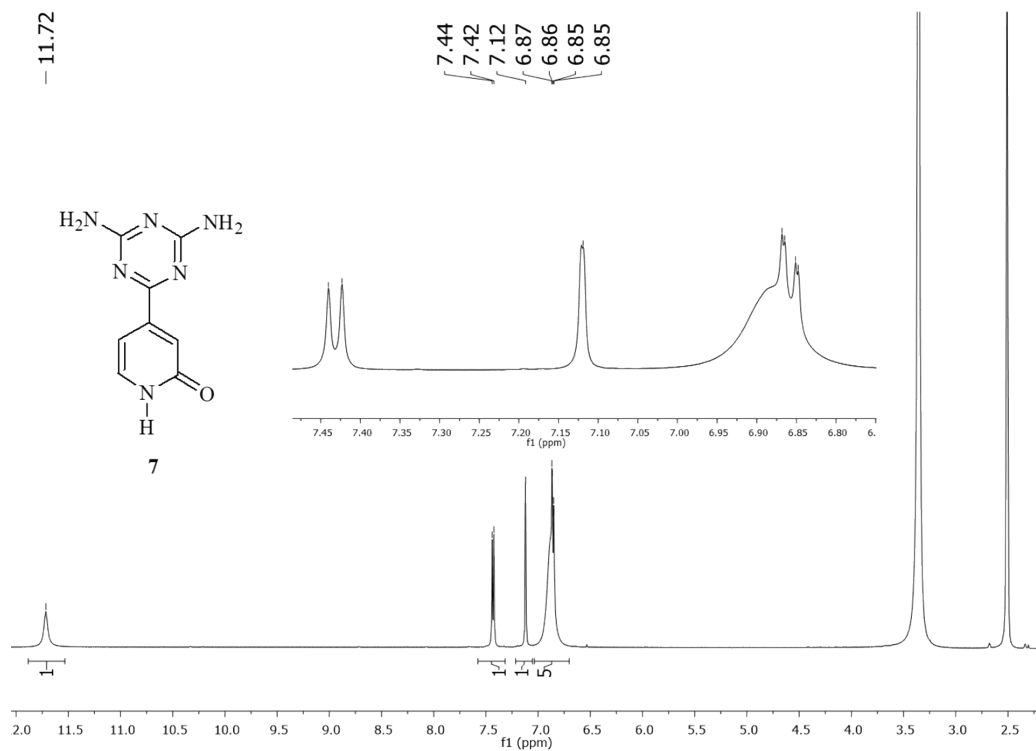

**Fig. S15** <sup>1</sup>H NMR spectrum **7** in DMSO-*d*<sub>6</sub>.

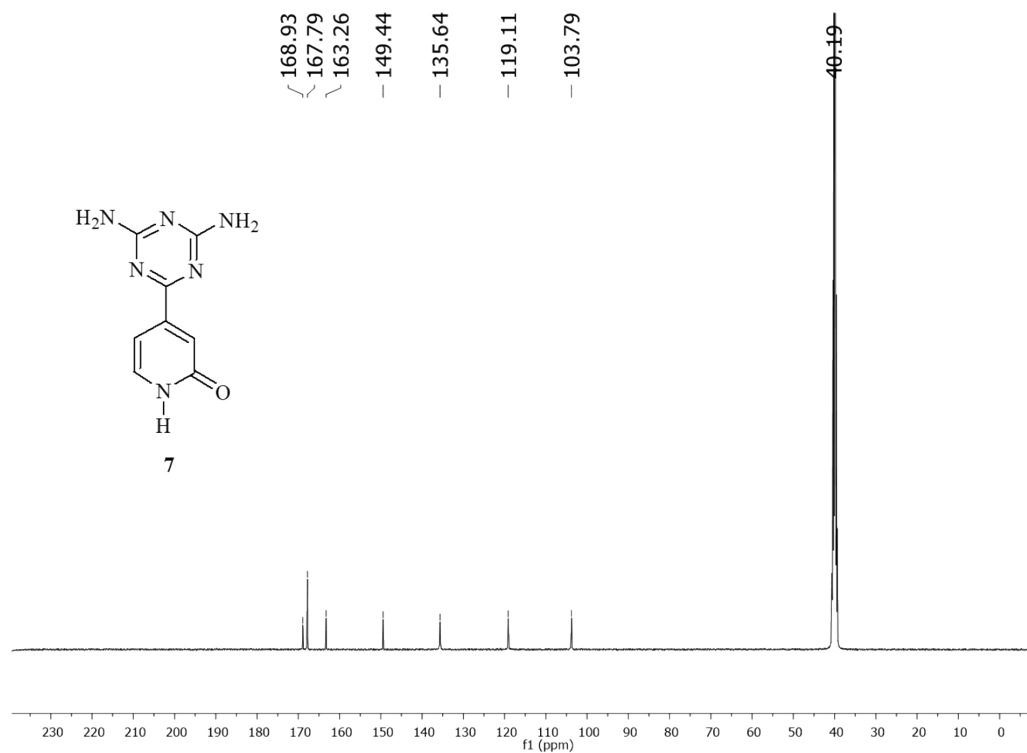

**Fig. S16** <sup>13</sup>C NMR spectrum **7** in DMSO-*d*<sub>6</sub>.

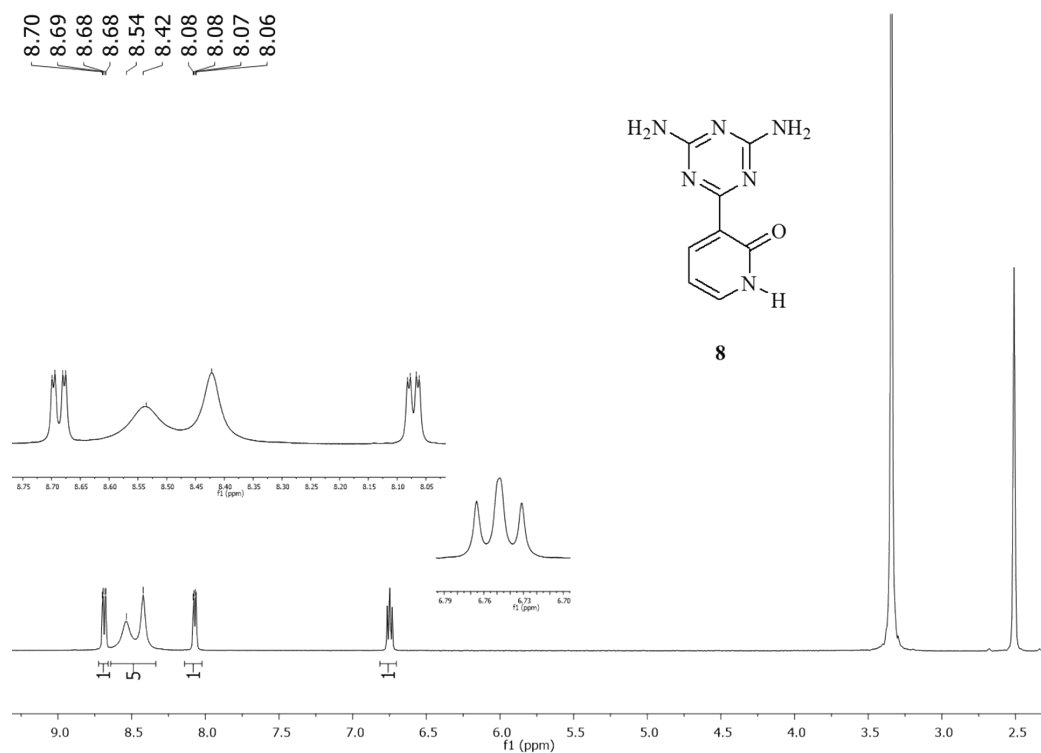

**Fig. S17**  $^1\text{H}$  NMR spectrum **8** in  $\text{DMSO-}d_6$ .

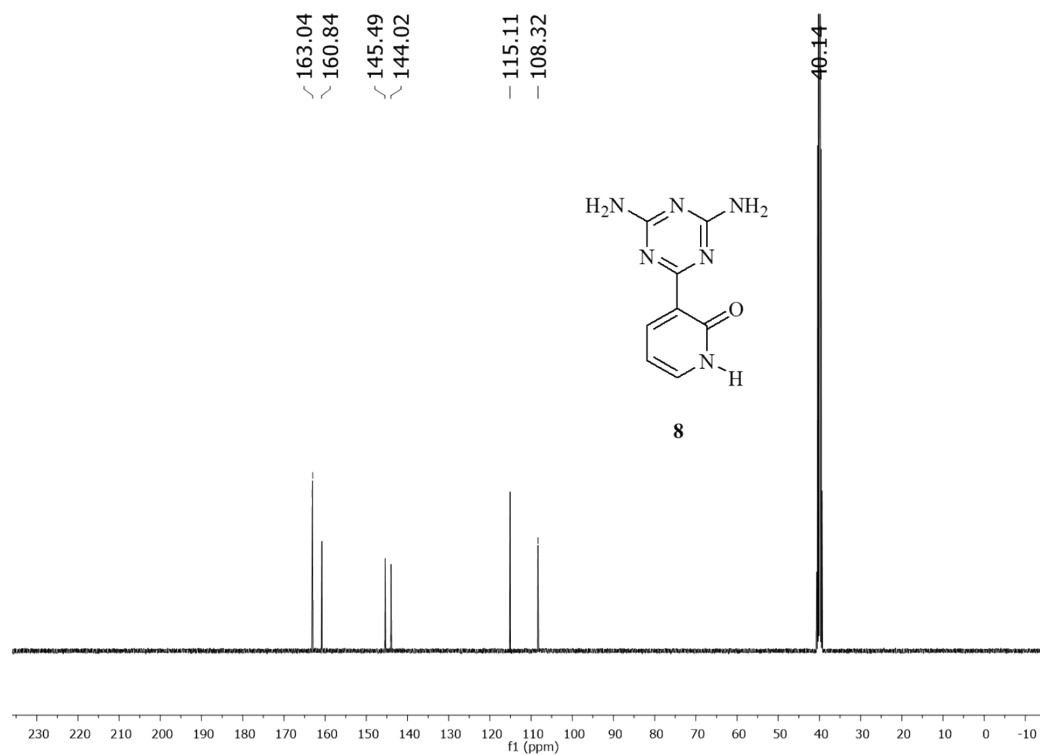

**Fig. S18**  $^{13}\text{C}$  NMR spectrum **8** in  $\text{DMSO-}d_6$ .

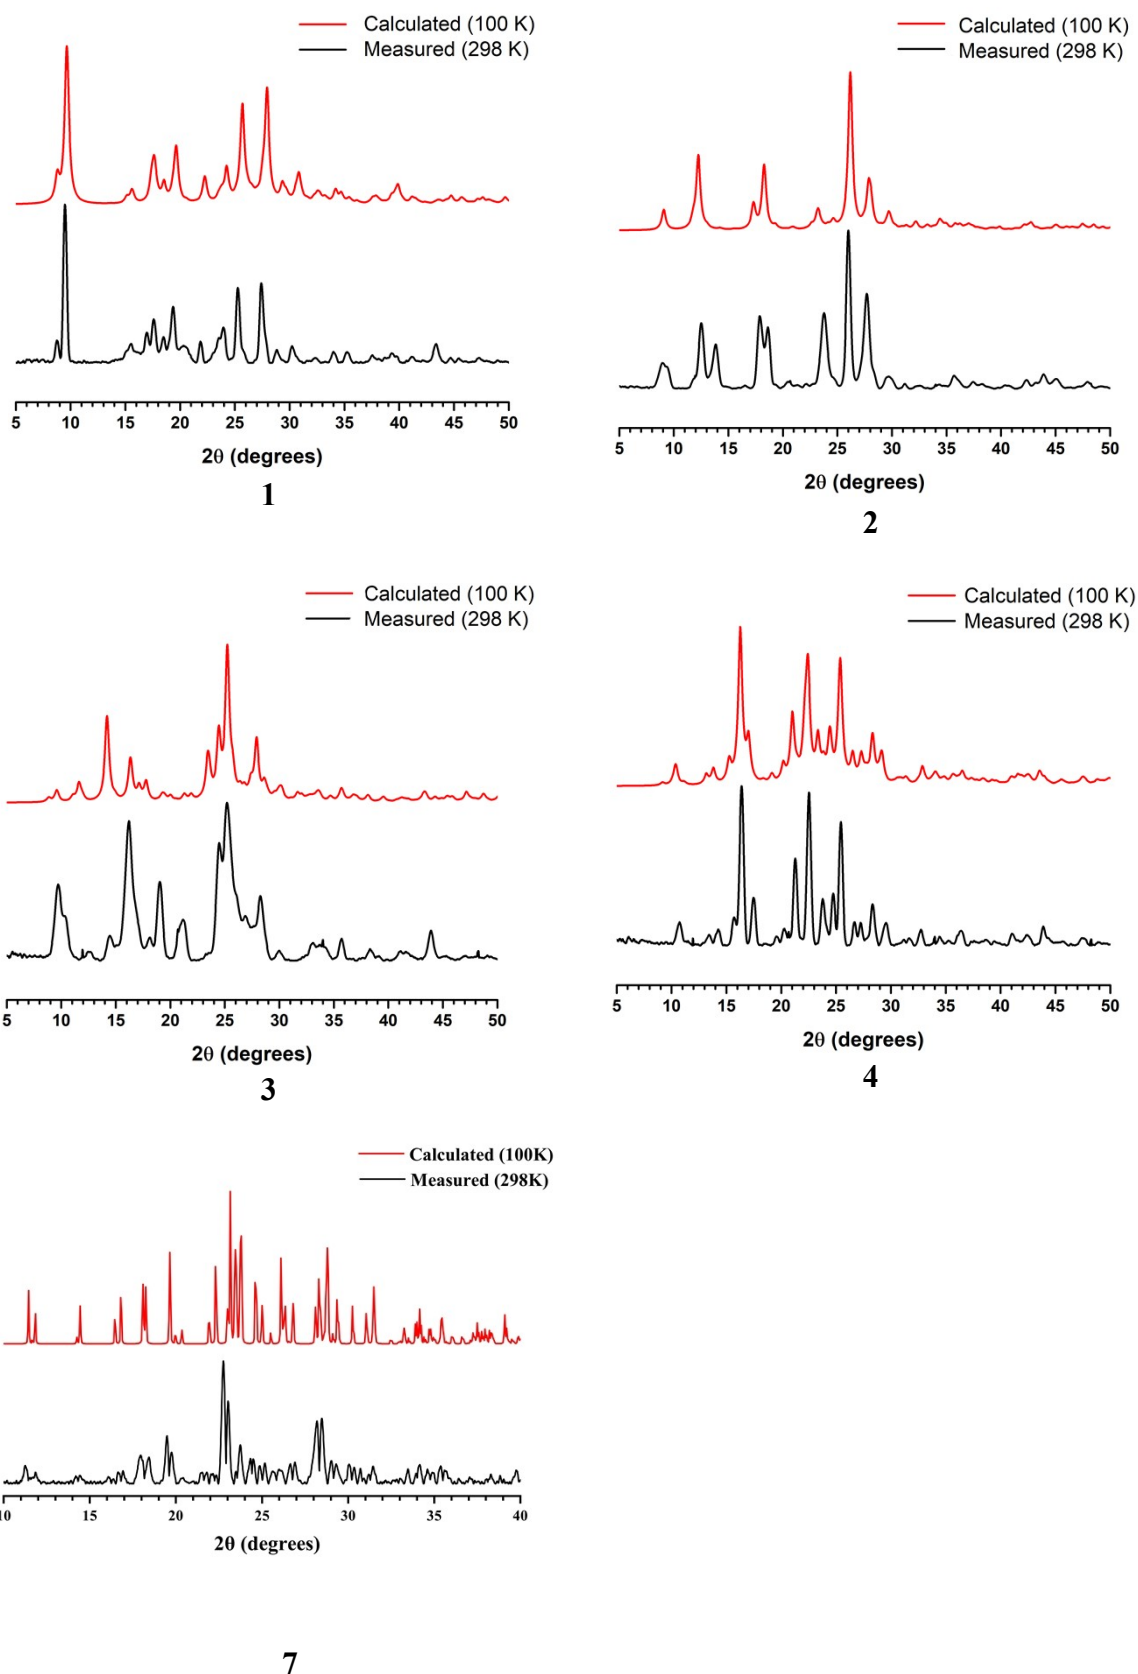

**Fig. S19** PXRD of 1-4 and 5 and 7. Comparison of the measured powder X-ray diffraction (in black) with simulated patterns (in red) calculated from single-crystal structures.

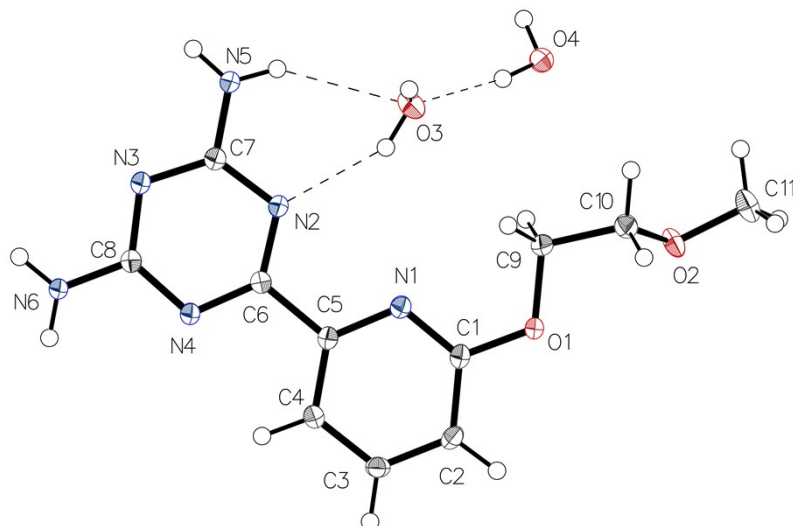

**Fig. S20** Thermal atomic displacement ellipsoid plot of the structure of **1** grown from slow evaporation of water. The ellipsoids of non-hydrogen atoms are drawn at 50% probability level and hydrogen atoms are represented by a sphere of arbitrary size.

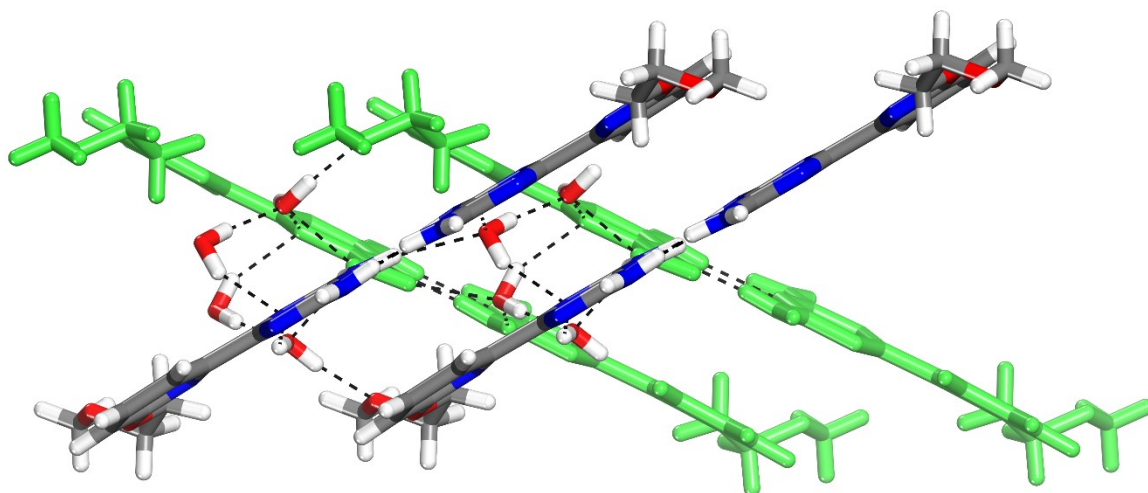

**Fig. S21** View showing hydrogen bonding between two adjacent layers in crystal of **1**, with one layer highlighted in green for clarity. Hydrogen bonds are represented by dashed lines. Unless stated otherwise, carbon atoms are shown in grey, hydrogen atoms in white, oxygen atoms in red and nitrogen atoms in blue.

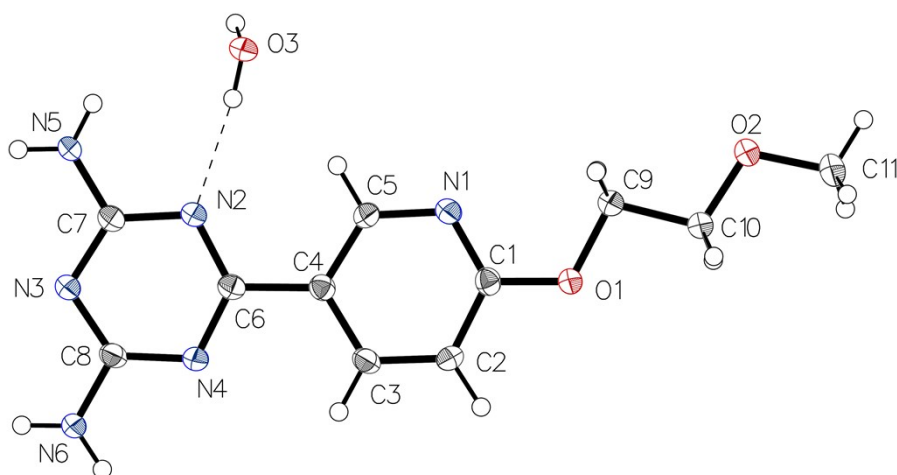

**Fig. S22** Thermal atomic displacement ellipsoid plot of the structure of **2** grown from slow evaporation of water. The ellipsoids of non-hydrogen atoms are drawn at 50% probability level and hydrogen atoms are represented by a sphere of arbitrary size.

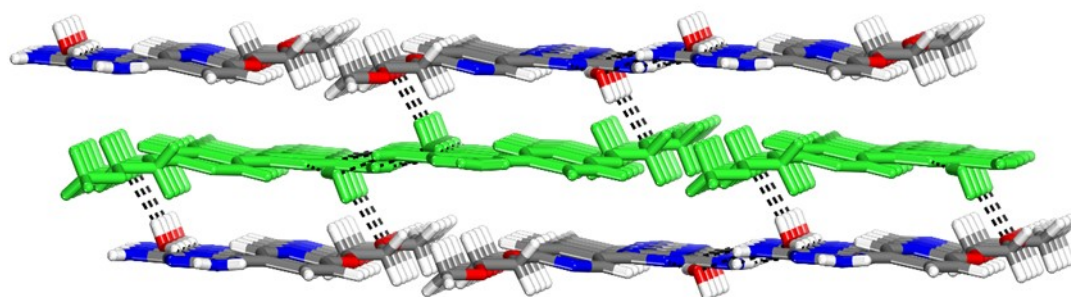

**Fig. S23** View showing the adjacent stacking of layers in crystal of **2**. For clarity one layer is marked in green. Hydrogen bonds are represented by dashed lines. Unless stated otherwise, carbon atoms are shown in grey, hydrogen atoms in white, oxygen atoms in red and nitrogen atoms in blue.

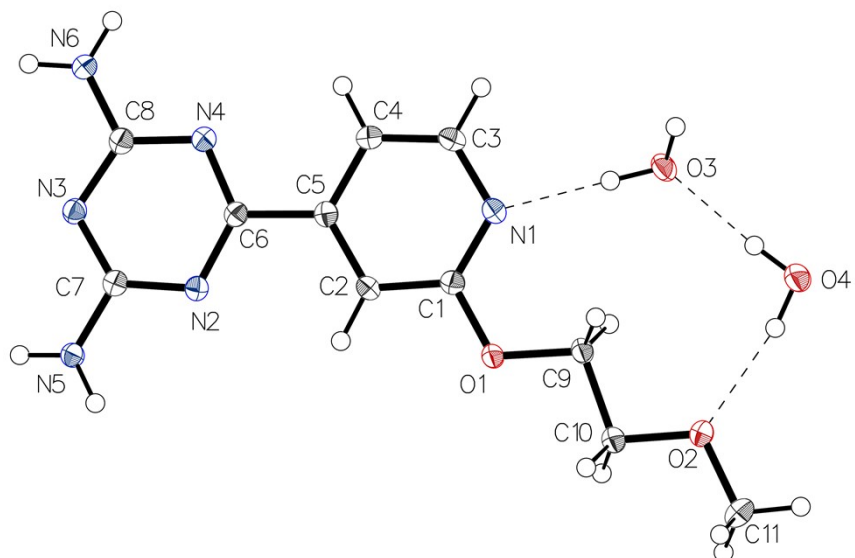

**Fig. S24** Thermal atomic displacement ellipsoid plot of the structure of **3** grown from slow evaporation of water. The ellipsoids of non-hydrogen atoms are drawn at 50% probability level and hydrogen atoms are represented by a sphere of arbitrary size.

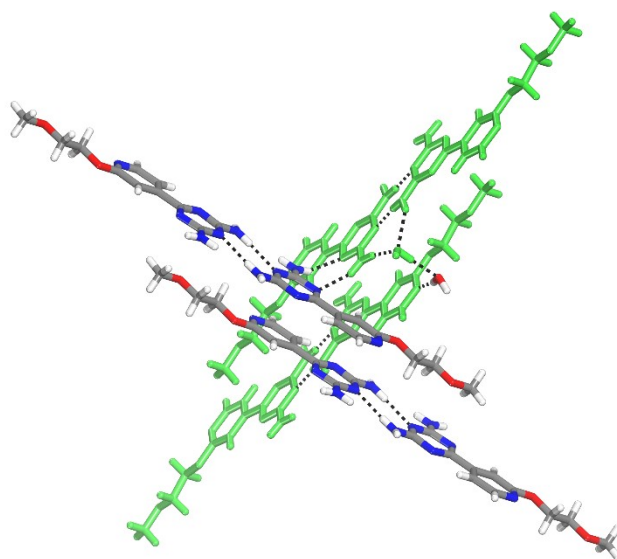

**Fig. S25** View showing hydrogen bonding between adjacent layers in crystal of **3**, one layer highlighted in green for clarity. Hydrogen bonds are represented by dashed lines. Unless stated otherwise, carbon atoms are shown in grey, hydrogen atoms in white, oxygen atoms in red and nitrogen atoms in blue.

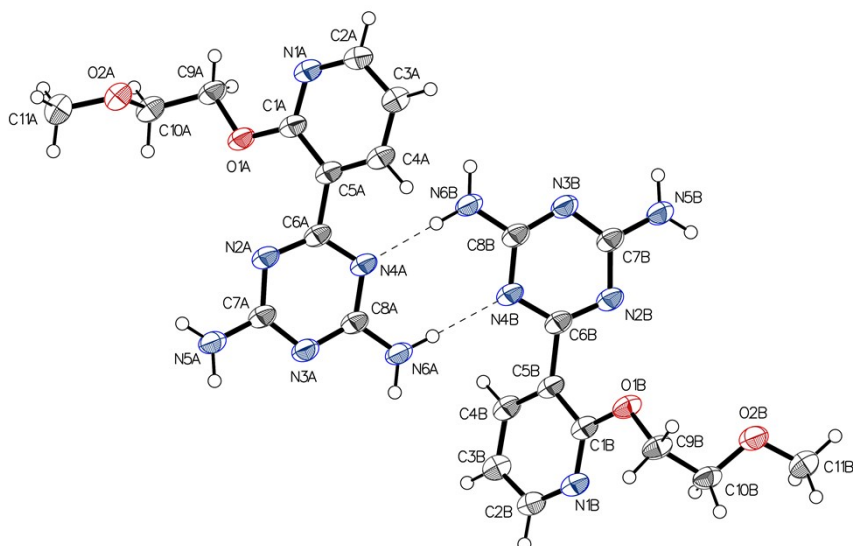

**Fig. S26** Thermal atomic displacement ellipsoid plot of the structure of **4** grown from slow evaporation of water. The ellipsoids of non-hydrogen atoms are drawn at 50% probability level and hydrogen atoms are represented by a sphere of arbitrary size.

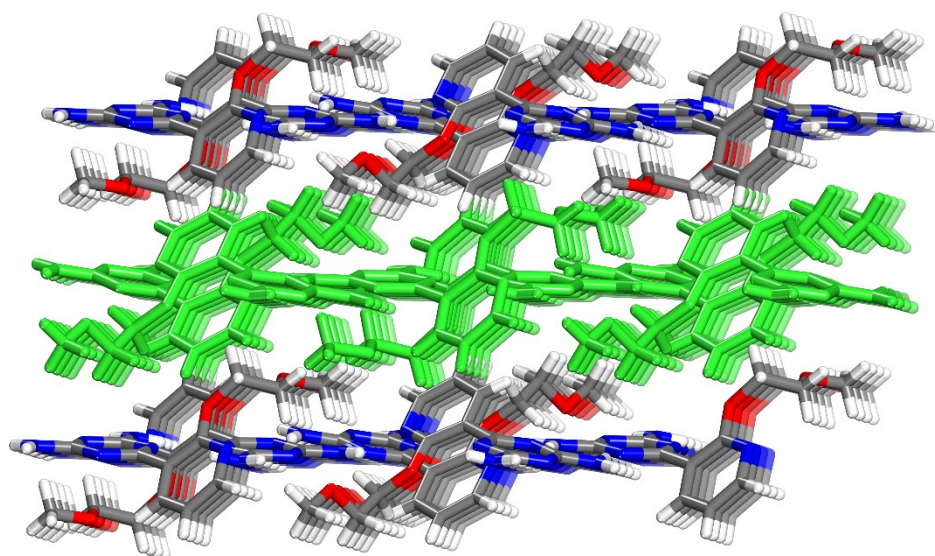

**Fig. S27** View showing the packing of layers in crystal of **4**. For clarity one layer is marked in green. Hydrogen bonds are represented by dashed lines. Unless stated otherwise, carbon atoms are shown in grey, hydrogen atoms in white, oxygen atoms in red and nitrogen atoms in blue.



**Table S1** Hydrogen-bond geometry (Å, °) in structure of **1**

| <i>D</i> — <i>H</i> ··· <i>A</i> | <i>D</i> — <i>H</i> | <i>H</i> ··· <i>A</i> | <i>D</i> ··· <i>A</i> | <i>D</i> — <i>H</i> ··· <i>A</i> |
|----------------------------------|---------------------|-----------------------|-----------------------|----------------------------------|
| O3—H3A···O2 <sup>i</sup>         | 0.849(15)           | 2.243(16)             | 3.0282(12)            | 153.9(19)                        |
| O3—H3B···N2                      | 0.847(14)           | 2.165(16)             | 2.9143(13)            | 147.4(17)                        |
| O4—H4A···O3                      | 0.865(13)           | 1.977(14)             | 2.8357(12)            | 171.7(16)                        |
| O4—H4B···N2 <sup>ii</sup>        | 0.849(15)           | 2.243(16)             | 3.0282(12)            | 153.9(19)                        |
| N6—H6A···O4 <sup>iii</sup>       | 0.861(12)           | 2.287(14)             | 2.9830(13)            | 138.0(13)                        |
| N6—H6B···N3 <sup>iv</sup>        | 0.864(13)           | 2.102(13)             | 2.9635(14)            | 174.6(14)                        |
| N5—H5A···O4 <sup>v</sup>         | 0.856(13)           | 2.315(14)             | 3.1519(13)            | 165.8(14)                        |
| N5—H5B···O3                      | 0.845(13)           | 2.422(14)             | 3.1484(13)            | 144.5(14)                        |

Symmetry codes: (i)  $x, y-1, z$ ; (ii)  $-x+1, y, -z+1/2$ ; (iii)  $x+1/2, -y+1/2, z+1/2$ ; (iv)  $-x+3/2, -y-1/2, -z+1$ ; (v)  $-x+1, y-1, -z+1/2$ .

**Table S2** Hydrogen-bond geometry (Å, °) in structure of **2**

| <i>D</i> — <i>H</i> ··· <i>A</i> | <i>D</i> — <i>H</i> | <i>H</i> ··· <i>A</i> | <i>D</i> ··· <i>A</i> | <i>D</i> — <i>H</i> ··· <i>A</i> |
|----------------------------------|---------------------|-----------------------|-----------------------|----------------------------------|
| N5—H5A···O3 <sup>i</sup>         | 0.85(2)             | 2.27(2)               | 2.9380(18)            | 134.8(19)                        |
| N5—H5B···N3 <sup>ii</sup>        | 0.84(2)             | 2.22(2)               | 3.0547(19)            | 173.5(18)                        |
| N6—H6A···O3 <sup>iii</sup>       | 0.86(2)             | 2.13(2)               | 2.9826(18)            | 168.5(18)                        |
| N6—H6B···N1 <sup>iii</sup>       | 0.87(2)             | 2.32(2)               | 3.0822(19)            | 147.3(18)                        |
| O3—H3A···N2                      | 0.83(2)             | 2.01(2)               | 2.8408(17)            | 173(2)                           |
| O3—H3B···O2 <sup>iv</sup>        | 0.86(3)             | 1.97(3)               | 2.8235(17)            | 169(2)                           |

Symmetry codes: (i)  $-x+1, -y+1, -z+2$ ; (ii)  $-x+1, -y, -z+2$ ; (iii)  $x, y-1, z$ ; (iv)  $-x+1, -y+2, -z+1$ .

**Table S3** Hydrogen-bond geometry (Å, °) in structure of **3**

| <i>D</i> — <i>H</i> ··· <i>A</i> | <i>D</i> — <i>H</i> | <i>H</i> ··· <i>A</i> | <i>D</i> ··· <i>A</i> | <i>D</i> — <i>H</i> ··· <i>A</i> |
|----------------------------------|---------------------|-----------------------|-----------------------|----------------------------------|
| N5—H5A···N2 <sup>i</sup>         | 0.876(12)           | 2.280(12)             | 3.0880(12)            | 153.4(12)                        |
| N5—H5B···O4 <sup>ii</sup>        | 0.881(12)           | 2.135(12)             | 3.0041(12)            | 169.1(13)                        |
| N6—H6A···O4 <sup>iii</sup>       | 0.879(12)           | 2.291(13)             | 2.9780(13)            | 134.9(12)                        |
| N6—H6B···N3 <sup>iv</sup>        | 0.892(12)           | 2.110(13)             | 3.0005(13)            | 175.9(14)                        |
| O3—H3A···N1                      | 0.879(14)           | 1.930(14)             | 2.7983(10)            | 169.1(17)                        |
| O4—H4A···O2                      | 0.872(15)           | 2.051(15)             | 2.9105(12)            | 168.4(17)                        |
| O4—H4B···O3                      | 0.864(14)           | 1.908(14)             | 2.7711(12)            | 176.0(16)                        |

Symmetry codes: (i)  $-x+1, y, -z+1/2$ ; (ii)  $x-1, -y+1, z-1/2$ ; (iii)  $-x+3/2, y-1/2, -z+3/2$ ; (iv)  $-x+1/2, -y+1/2, -z+1$ .

**Table S4** Hydrogen-bond geometry (Å, °) in structure of **4**

| <i>D</i> — <i>H</i> ··· <i>A</i> | <i>D</i> — <i>H</i> | <i>H</i> ··· <i>A</i> | <i>D</i> ··· <i>A</i> | <i>D</i> — <i>H</i> ··· <i>A</i> |
|----------------------------------|---------------------|-----------------------|-----------------------|----------------------------------|
| N5A—H5AA···O2A <sup>i</sup>      | 0.892(14)           | 2.457(18)             | 3.1347(16)            | 133.1(17)                        |
| N5A—H5AB···N2A <sup>i</sup>      | 0.896(14)           | 2.042(14)             | 2.9372(18)            | 176(2)                           |
| N6A—H6AA···N4B                   | 0.896(13)           | 2.103(13)             | 2.9976(18)            | 176.8(17)                        |
| N6A—H6AB···N1B <sup>ii</sup>     | 0.898(13)           | 2.303(15)             | 3.1199(16)            | 151.2(17)                        |
| N5B—H5BB···N2B <sup>iii</sup>    | 0.894(14)           | 2.099(14)             | 2.9904(18)            | 174.5(19)                        |
| N6B—H6BA···N1A <sup>iv</sup>     | 0.894(13)           | 2.142(14)             | 2.9882(17)            | 157.7(16)                        |
| N6B—H6BB···N4A                   | 0.902(13)           | 2.078(13)             | 2.9764(18)            | 174.3(17)                        |

Symmetry codes: (i)  $-x+1, -y+2, -z+2$ ; (ii)  $-x, -y+1, -z+2$ ; (iii)  $-x, -y+1, -z+1$ ; (iv)  $-x+1, -y+2, -z+1$ .

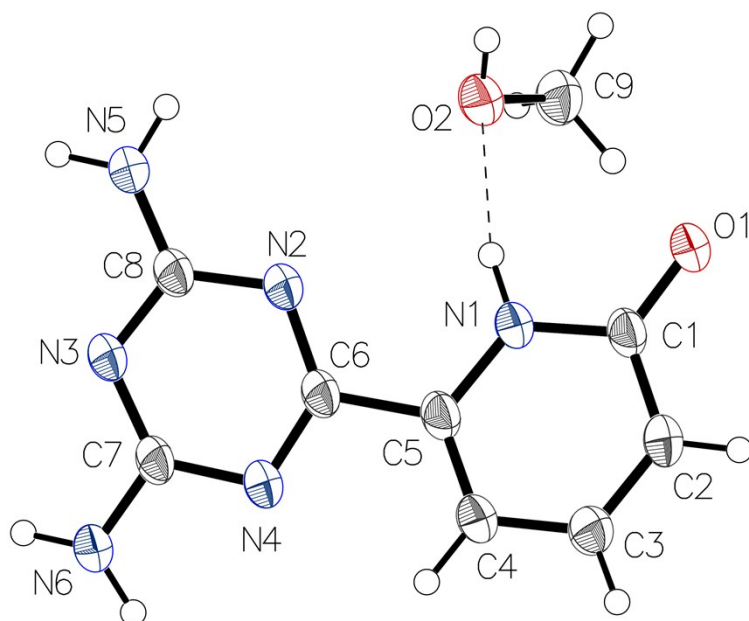

**Fig. S28** Thermal atomic displacement ellipsoid plot of the structure of **5** grown from slow evaporation of methanol. The ellipsoids of non-hydrogen atoms are drawn at 50% probability level and hydrogen atoms are represented by a sphere of arbitrary size.

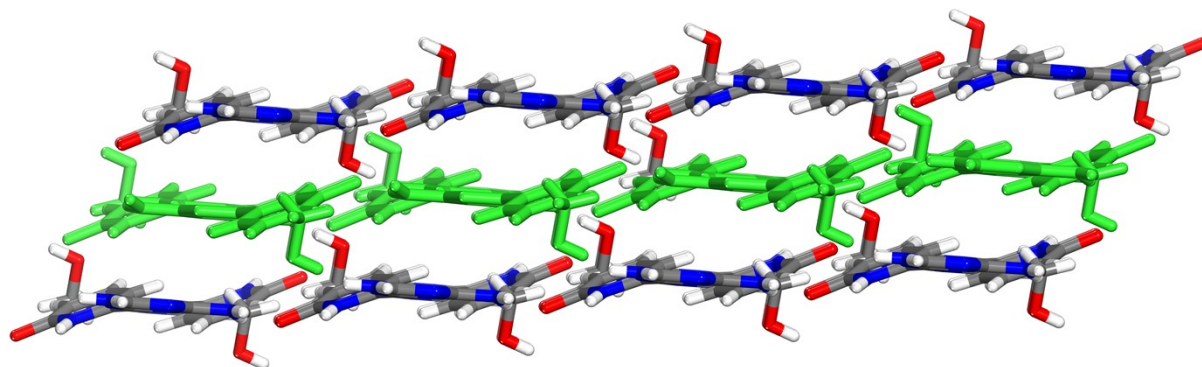

**Fig. S29** View showing the packing of layers in crystal of **5**. For clarity one layer is marked in green. Hydrogen bonds are represented by dashed lines. Unless stated otherwise, carbon atoms are shown in grey, hydrogen atoms in white, oxygen atoms in red and nitrogen atoms in blue.

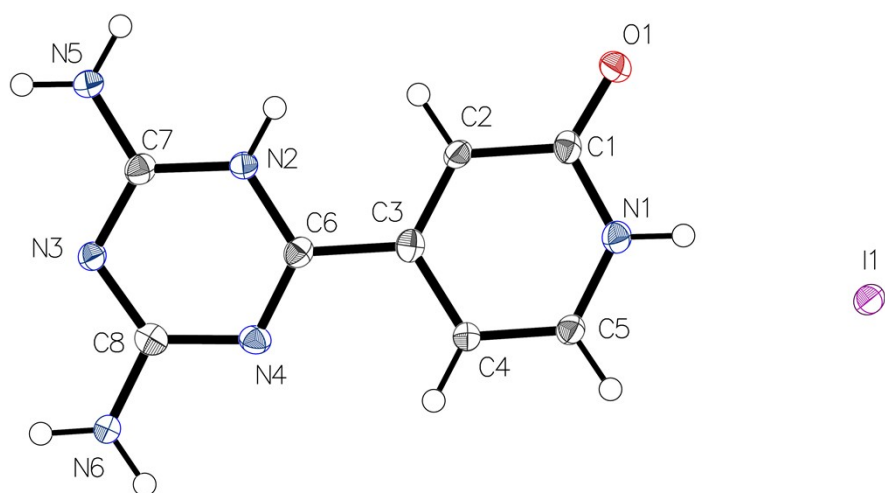

**Fig. S30** Thermal atomic displacement ellipsoid plot of the structure of **7** grown slow evaporation of acetic acid. The ellipsoids of non-hydrogen atoms are drawn at 50% probability level and hydrogen atoms are represented by a sphere of arbitrary size.

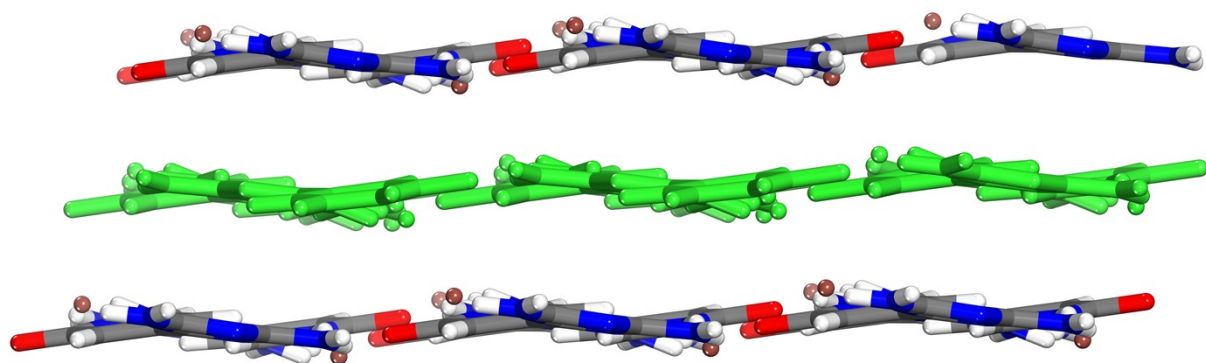

**Fig. S31** View showing the packing of layers in crystal of **7**. For clarity one layer is marked in green. Hydrogen bonds are represented by dashed lines. Unless stated otherwise, carbon atoms are shown in grey, hydrogen atoms in white, oxygen atoms in red and nitrogen atoms in blue.

**Table S5** Hydrogen-bond geometry (Å, °) in structure of **5**

| <i>D</i> — <i>H</i> ··· <i>A</i>    | <i>D</i> — <i>H</i> | <i>H</i> ··· <i>A</i> | <i>D</i> ··· <i>A</i> | <i>D</i> — <i>H</i> ··· <i>A</i> |
|-------------------------------------|---------------------|-----------------------|-----------------------|----------------------------------|
| N6—H6 <i>A</i> ···O1 <sup>i</sup>   | 0.906(13)           | 2.307(19)             | 3.037(2)              | 137(2)                           |
| N6—H6 <i>B</i> ···O1 <sup>ii</sup>  | 0.906(13)           | 2.071(15)             | 2.961(2)              | 167(2)                           |
| N5—H5 <i>A</i> ···N3 <sup>iii</sup> | 0.906(13)           | 2.087(13)             | 2.991(3)              | 176(3)                           |
| N1—H1···O2                          | 0.906(13)           | 2.027(15)             | 2.907(2)              | 164(2)                           |
| N5—H5 <i>B</i> ···O1 <sup>iv</sup>  | 0.906(13)           | 2.00(2)               | 2.764(2)              | 141(3)                           |
| O2—H2 <i>A</i> ···N2 <sup>iv</sup>  | 0.851(2)            | 2.099(11)             | 2.928(2)              | 165(4)                           |

Symmetry codes: (i) 1-x,1-y,1-z; (ii) 1+x,+y,1+z; (iii) 1-x,-y,2-z; (iv) -x,-y,1-z.

**Table S6** Hydrogen-bond geometry (Å, °) in structure of **7**

| <i>D</i> — <i>H</i> ··· <i>A</i> | <i>D</i> — <i>H</i> | <i>H</i> ··· <i>A</i> | <i>D</i> ··· <i>A</i> | <i>D</i> — <i>H</i> ··· <i>A</i> |
|----------------------------------|---------------------|-----------------------|-----------------------|----------------------------------|
| N1—H1···I1                       | 0.88                | 2.64                  | 3.469(5)              | 158.5                            |
| N2—H2···I1 <sup>i</sup>          | 0.88                | 2.74                  | 3.497(4)              | 145.1                            |
| N5—H5A···N3 <sup>ii</sup>        | 0.88                | 2.18                  | 3.061(7)              | 178.4                            |
| N5—H5B···O1 <sup>iii</sup>       | 0.88                | 2.22                  | 2.828(6)              | 125.6                            |
| N6—H6A···O1 <sup>iv</sup>        | 0.88                | 1.97                  | 2.843(6)              | 169.7                            |
| N6—H6B···I1 <sup>iv</sup>        | 0.88                | 3.02                  | 3.736(4)              | 139.8                            |

Symmetry codes: (i) 1-x,1-y,2-z; (ii) -x,2-y,1-z; (iii) 1-x,2-y,2-z; (iv) -1+x,+y,-1+z.

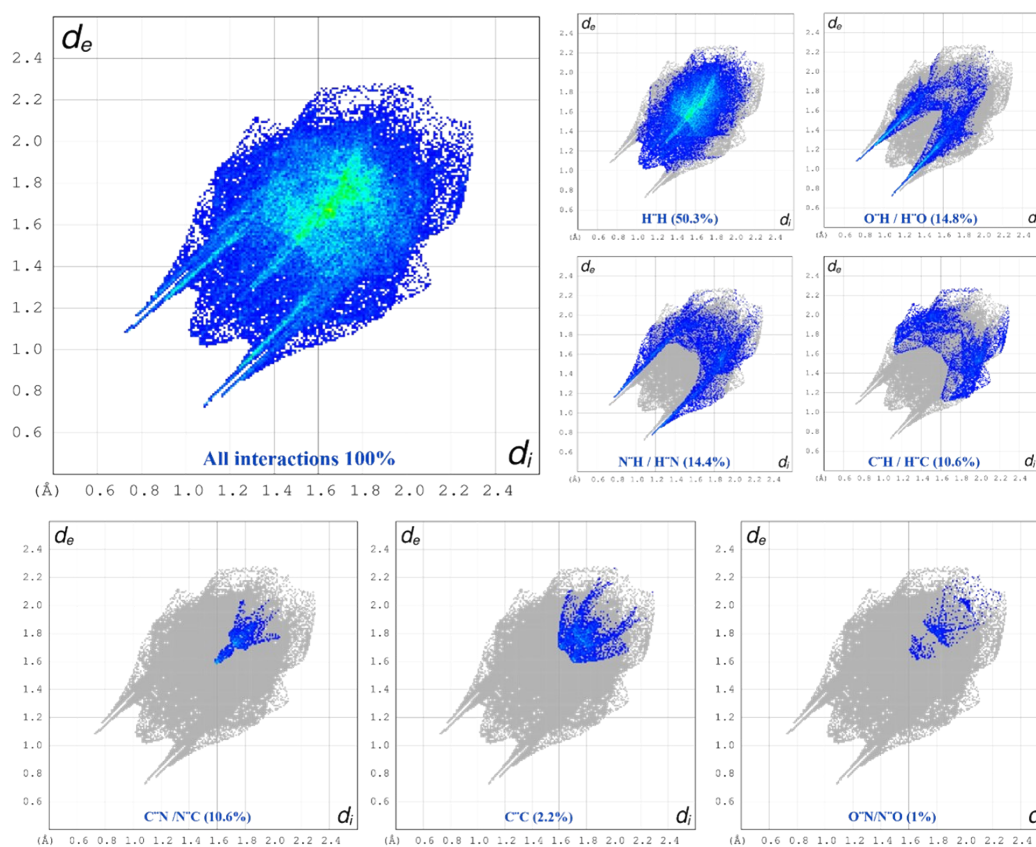

**Fig. S32** 2D fingerprint plots with relative contributions in percentage of various intermolecular contacts to HS area for **1**.

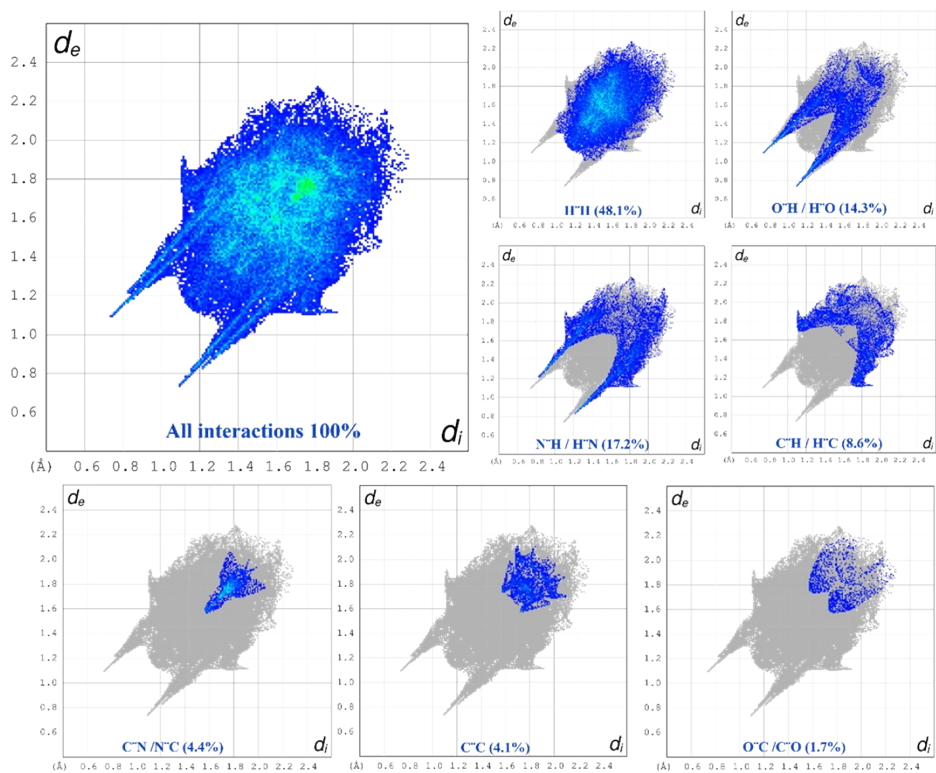

**Fig. S33** 2D fingerprint plots with relative contributions in percentage of various intermolecular contacts to HS area for **2**.

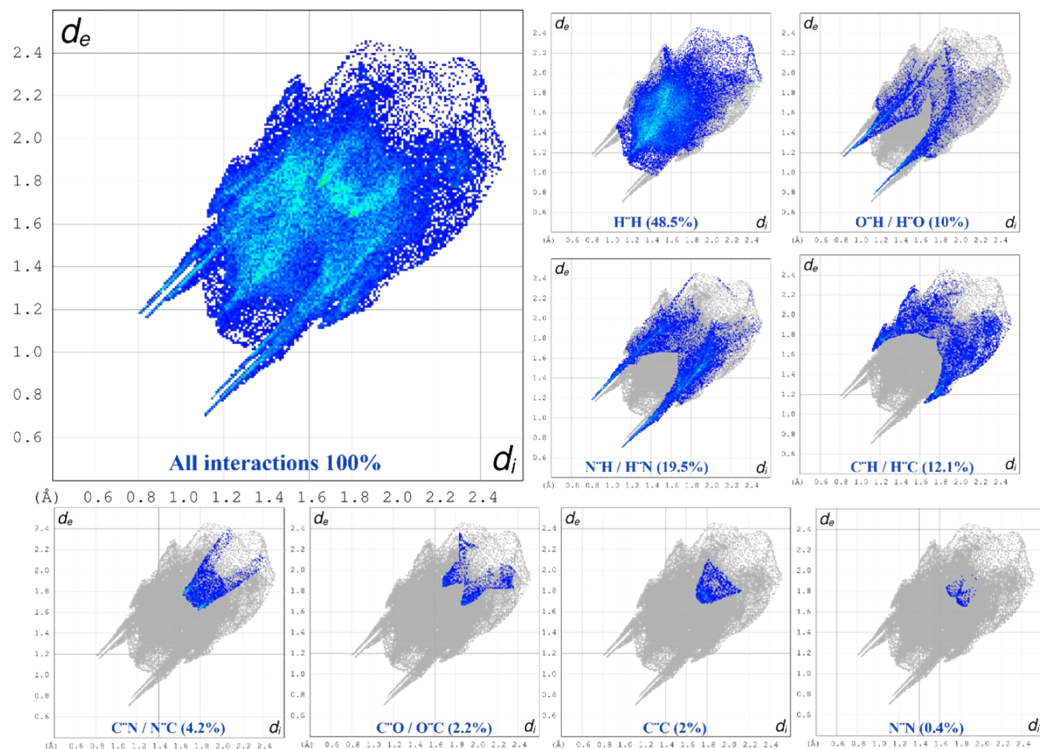

**Fig. S34** (a) Molecular Hirshfeld  $d_{\text{norm}}$ ,  $d_i$  and  $d_e$  surfaces mapped and (b) 2D fingerprint plots with relative contributions in percentage of various intermolecular contacts to HS area for **3**.

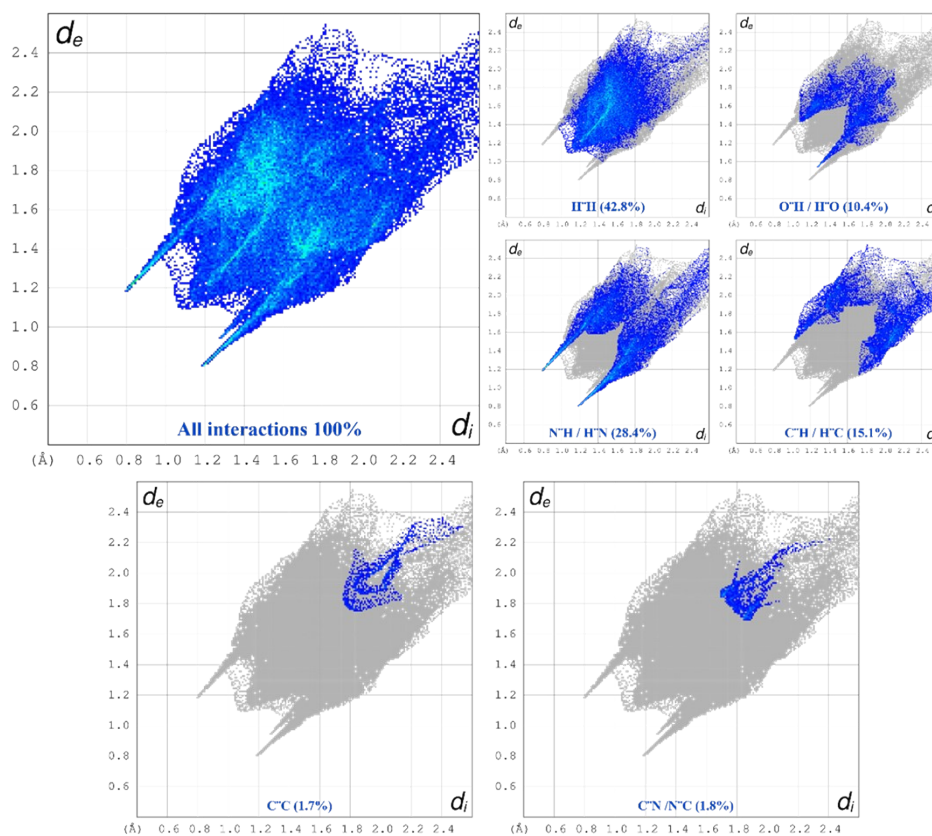

**Fig. S35** (a) Molecular Hirshfeld  $d_{norm}$ ,  $d_i$  and  $d_e$  surfaces mapped and (b) 2D fingerprint plots with relative contributions in percentage of various intermolecular contacts to HS area for **4**.

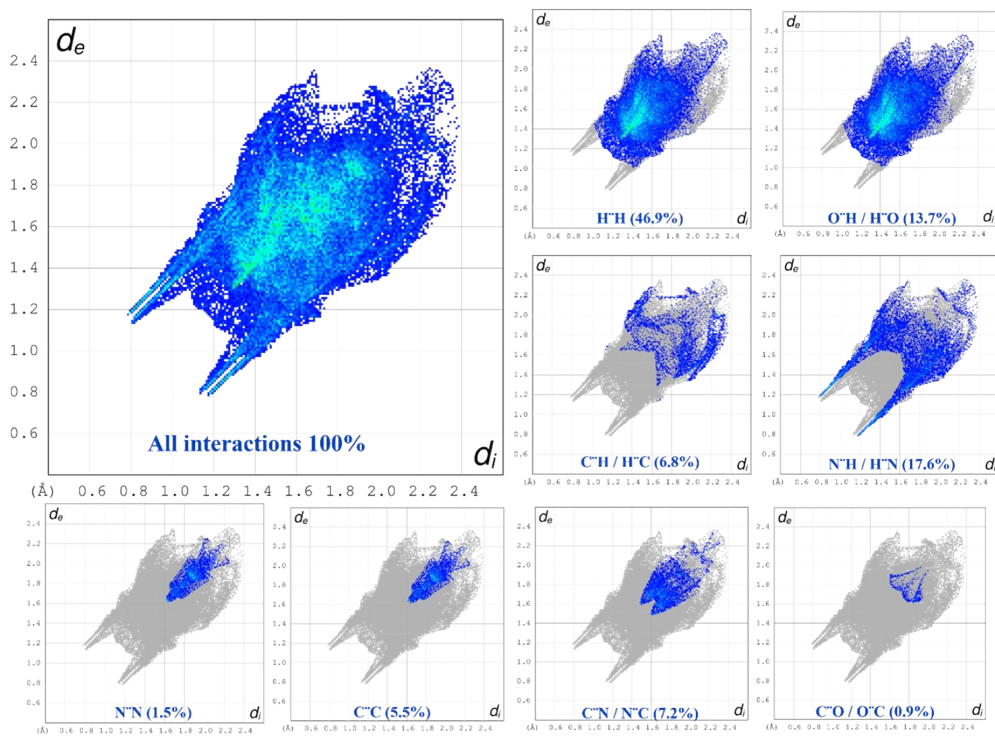

**Fig. S36** (a) Molecular Hirshfeld  $d_{norm}$ ,  $d_i$  and  $d_e$  surfaces mapped and (b) 2D fingerprint plots with relative contributions in percentage of various intermolecular contacts to HS area for **5**.

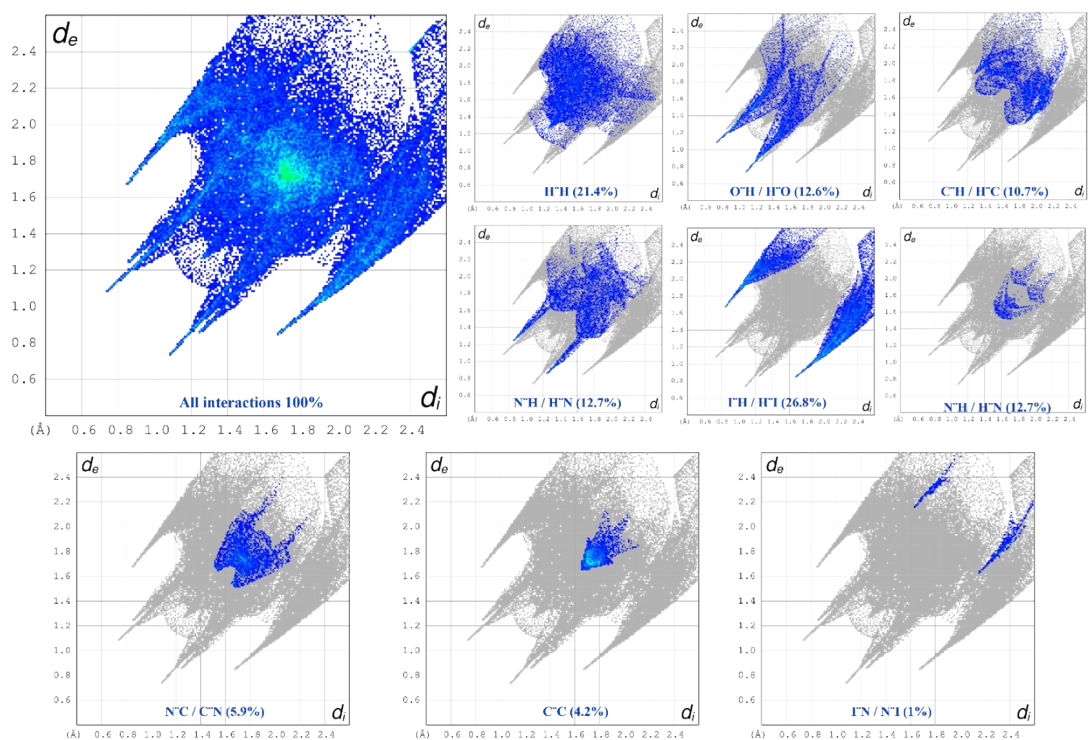

**Fig. S37** (a) Molecular Hirshfeld  $d_{norm}$ ,  $d_i$  and  $d_e$  surfaces mapped and (b) 2D fingerprint plots with relative contributions in percentage of various intermolecular contacts to HS area for 7.

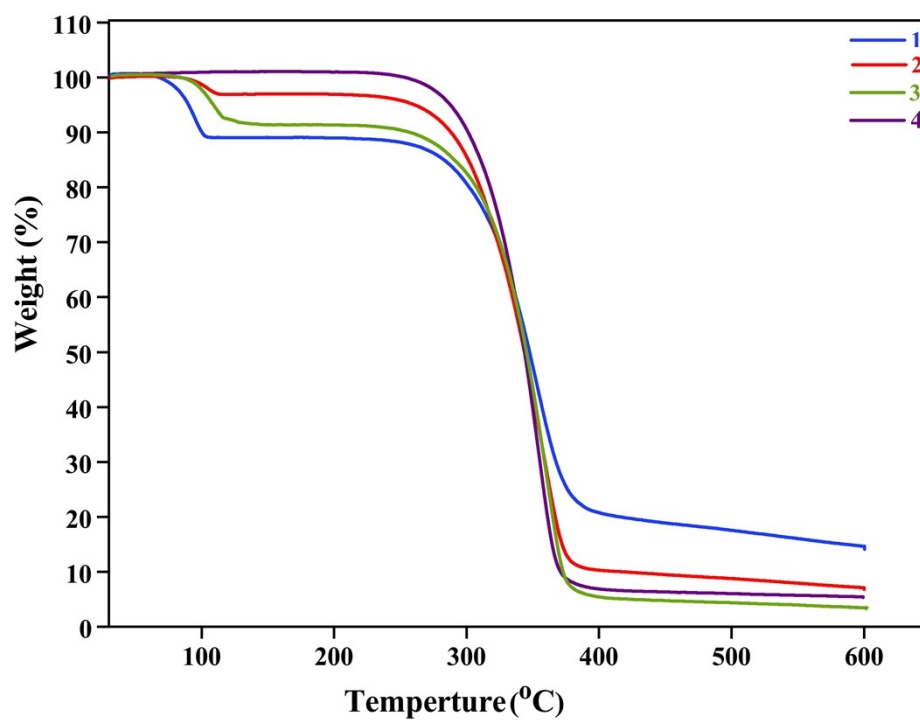

**Fig. S38** Thermogravimetric analysis curves of 1-4.

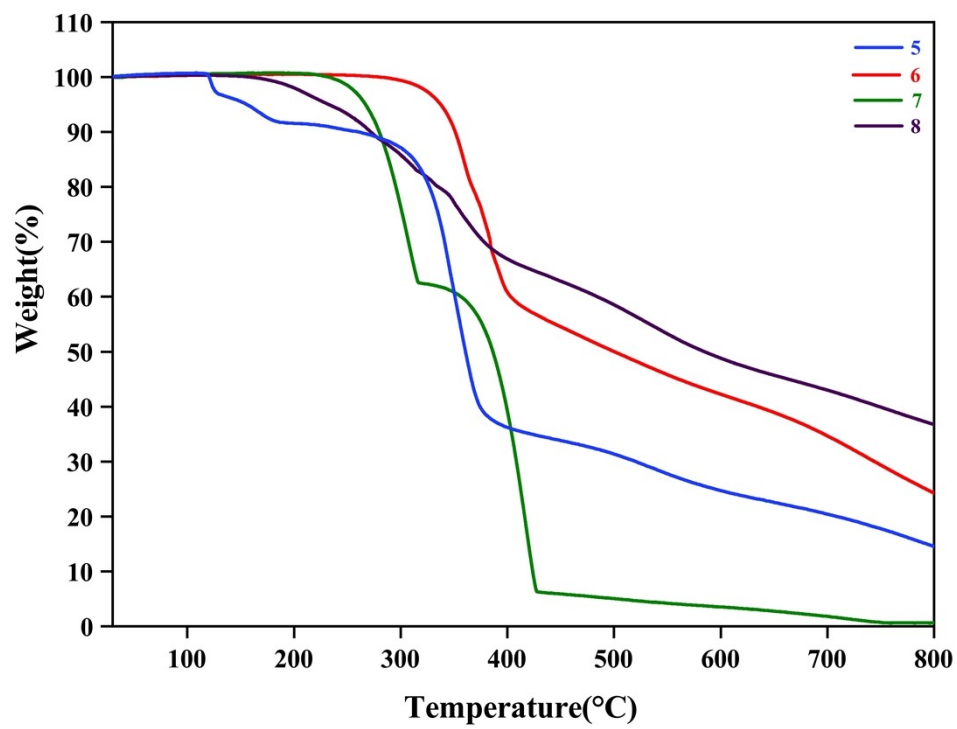

**Fig. S39** Thermogravimetric analysis curves of 5-8.
